# Supplementary material for: A Mass Spectrometry-Based Approach for Characterization of Red, Blue, and Purple Natural Dyes
Source: PubMed Central journal article supplement (PMC7397139; doi:10.3390/molecules25143223), 2020-07-15
Supplement: molecules-25-03223-s001.pdf [file molecules-25-03223-s001.pdf]

# **A mass spectrometry-based approach for characterization of red, blue, and purple natural dyes**

**Katarzyna Lech <sup>1,\*</sup> and Emilia Fornal <sup>2</sup>**

<sup>1</sup> Warsaw University of Technology, Faculty of Chemistry, Noakowskiego 3, 00-664 Warsaw, Poland;  
klech@ch.pw.edu.pl

<sup>2</sup> Medical University of Lublin, Department of Pathophysiology, Jaczewskiego 8b, 20-090 Lublin, Poland;  
emilia.fornal@umlub.pl

\* Correspondence: klech@ch.pw.edu.pl

## **Supplementary Materials**

### **Figures and Table**

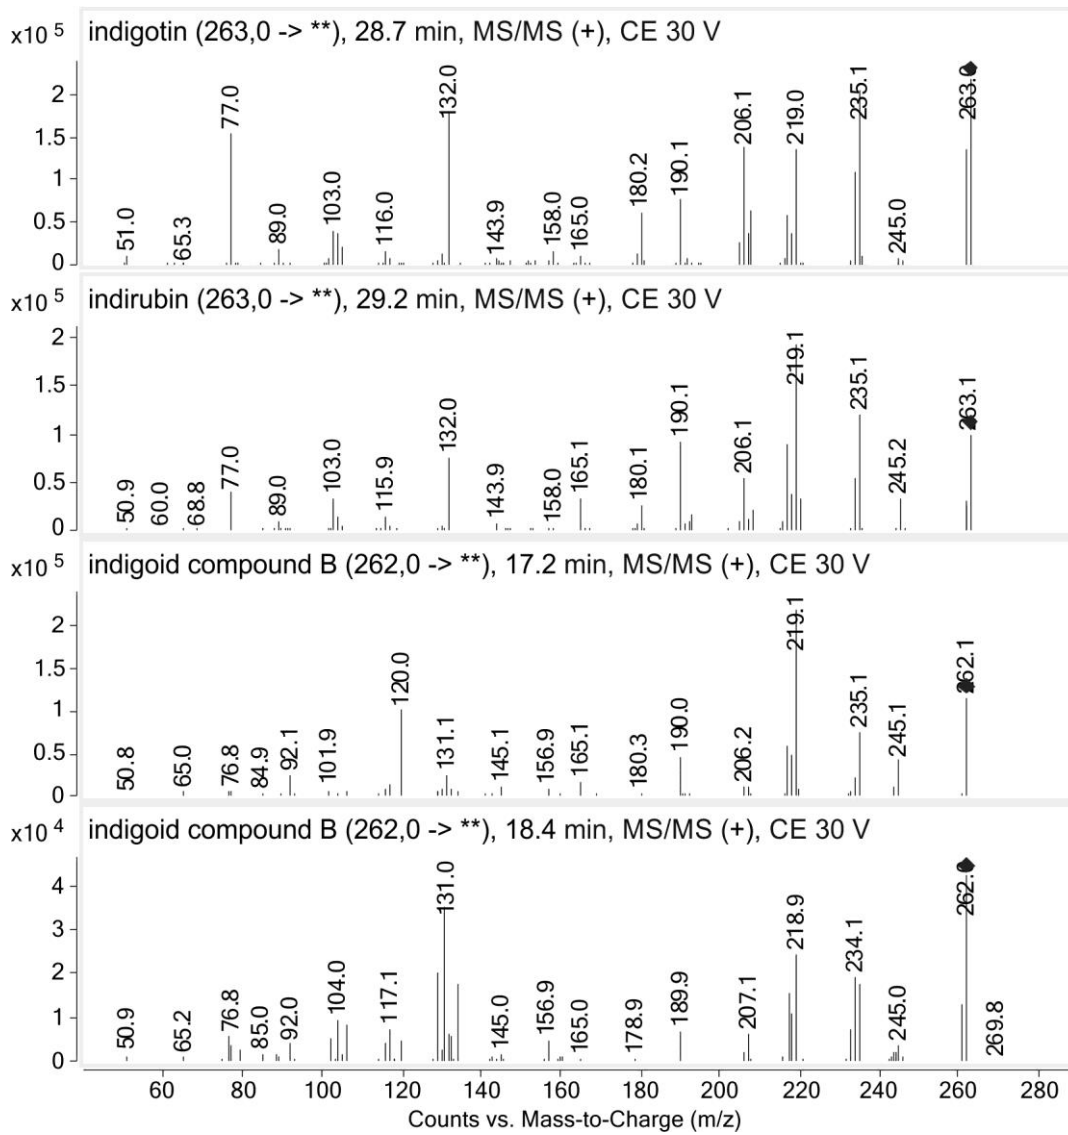

**Figure S1.** Indigo: MS/MS spectra of indigotin, indirubin, indigo compound A, and indigo compound A acquired in positive ion mode

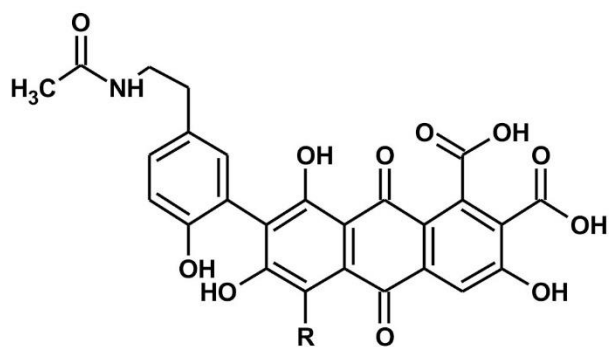

laccaic acid A, R = OH  
xantholaccaic acid A, R = H

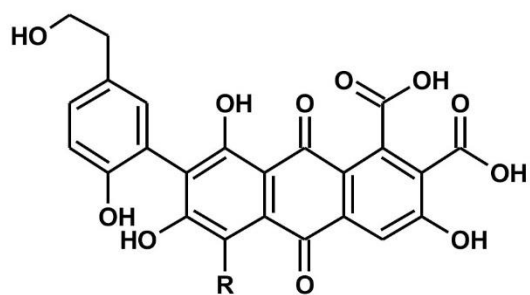

laccaic acid B, R = OH  
xantholaccaic acid B, R = H

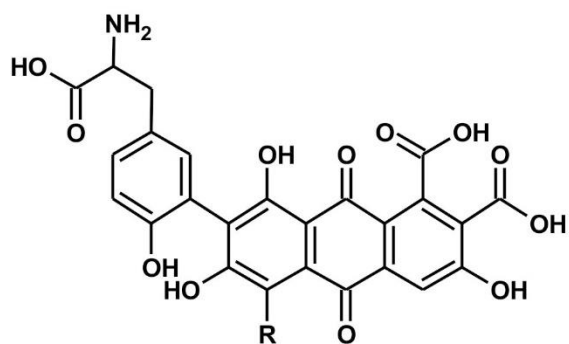

laccaic acid C, R = OH

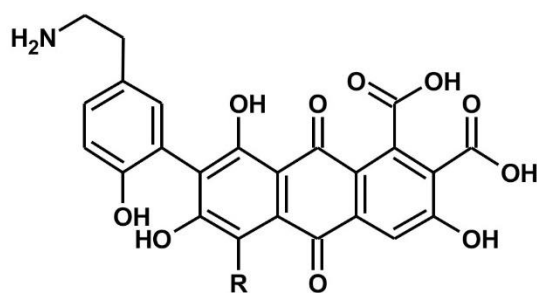

laccaic acid E, R = OH

**Figure S2.** Chemical structures of laccaic acids

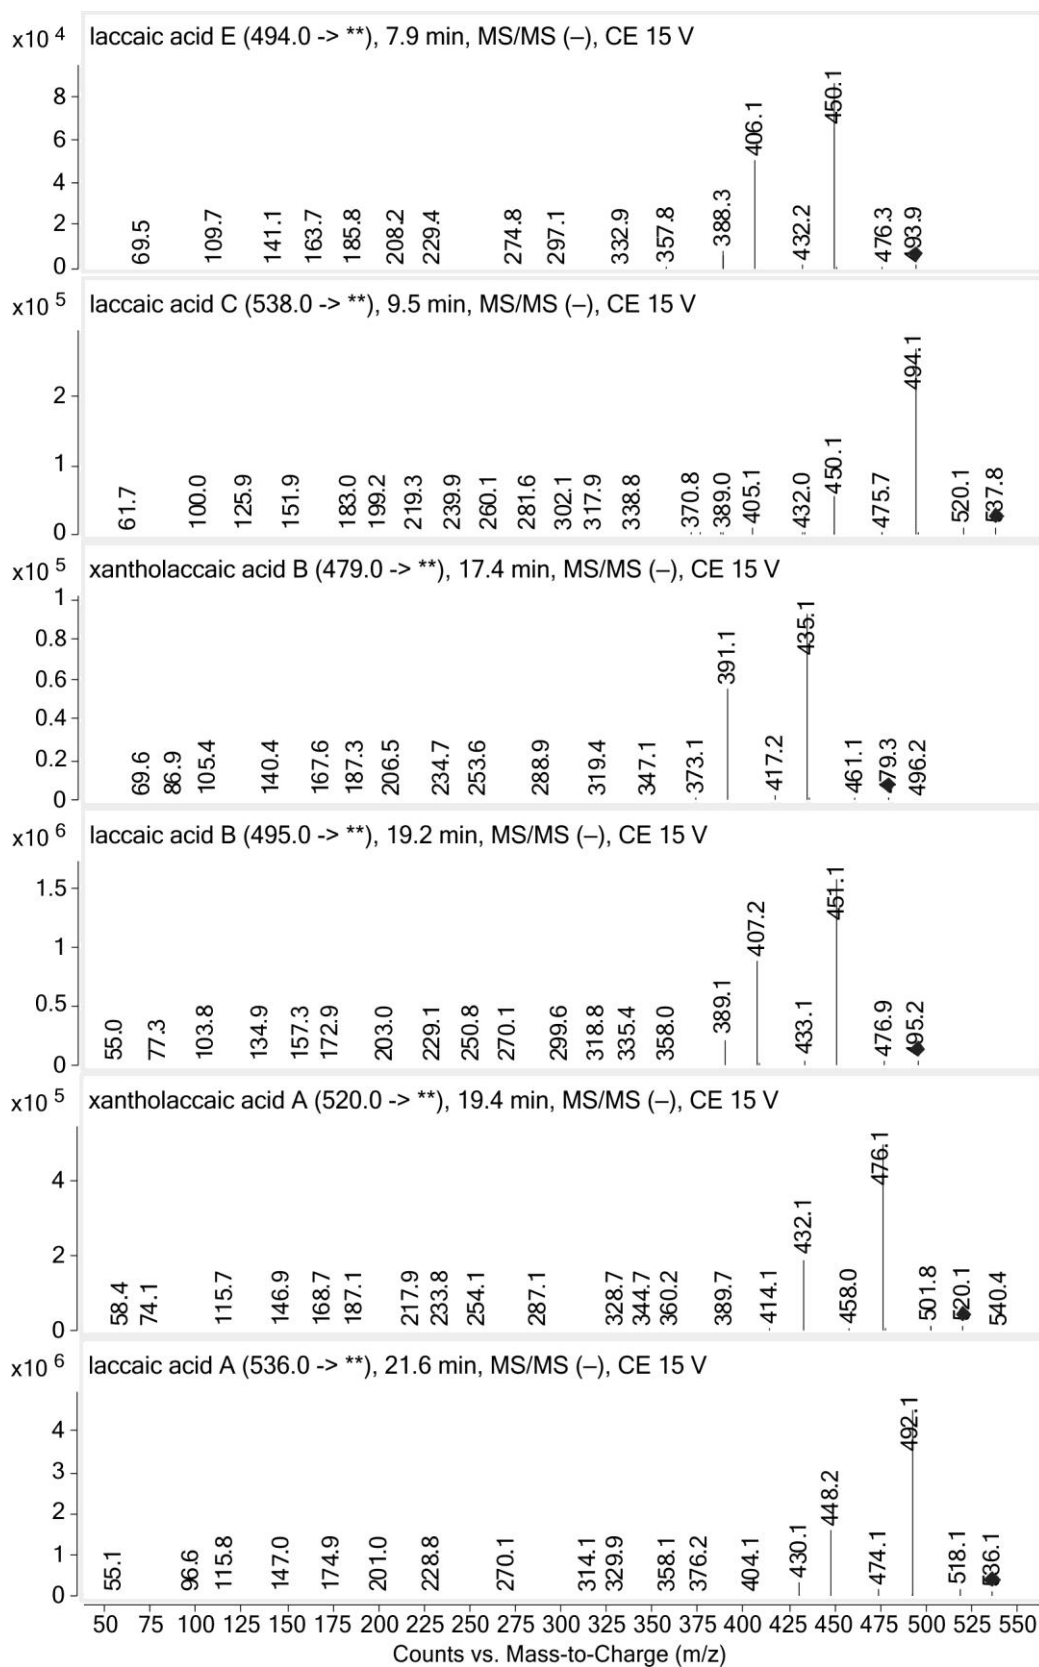

**Figure S3.** Lac dye: MS/MS spectra of laccaic acid E, laccaic acid C, xantholaccaic acid B, laccaic acid B, xantholaccaic acid A, and laccaic acid A, acquired in negative ion mode

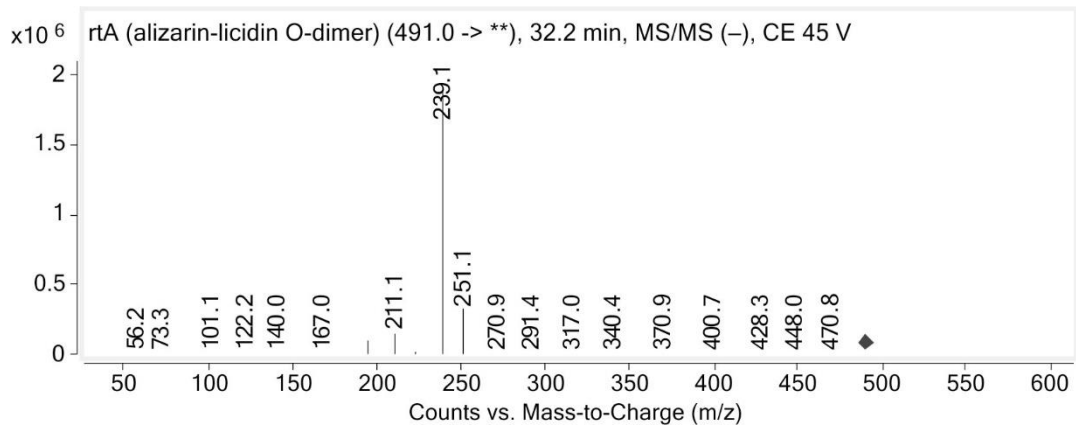

**Figure S4.** Madder: MS/MS spectra of rt1 (alizarin–lucidin dimer)

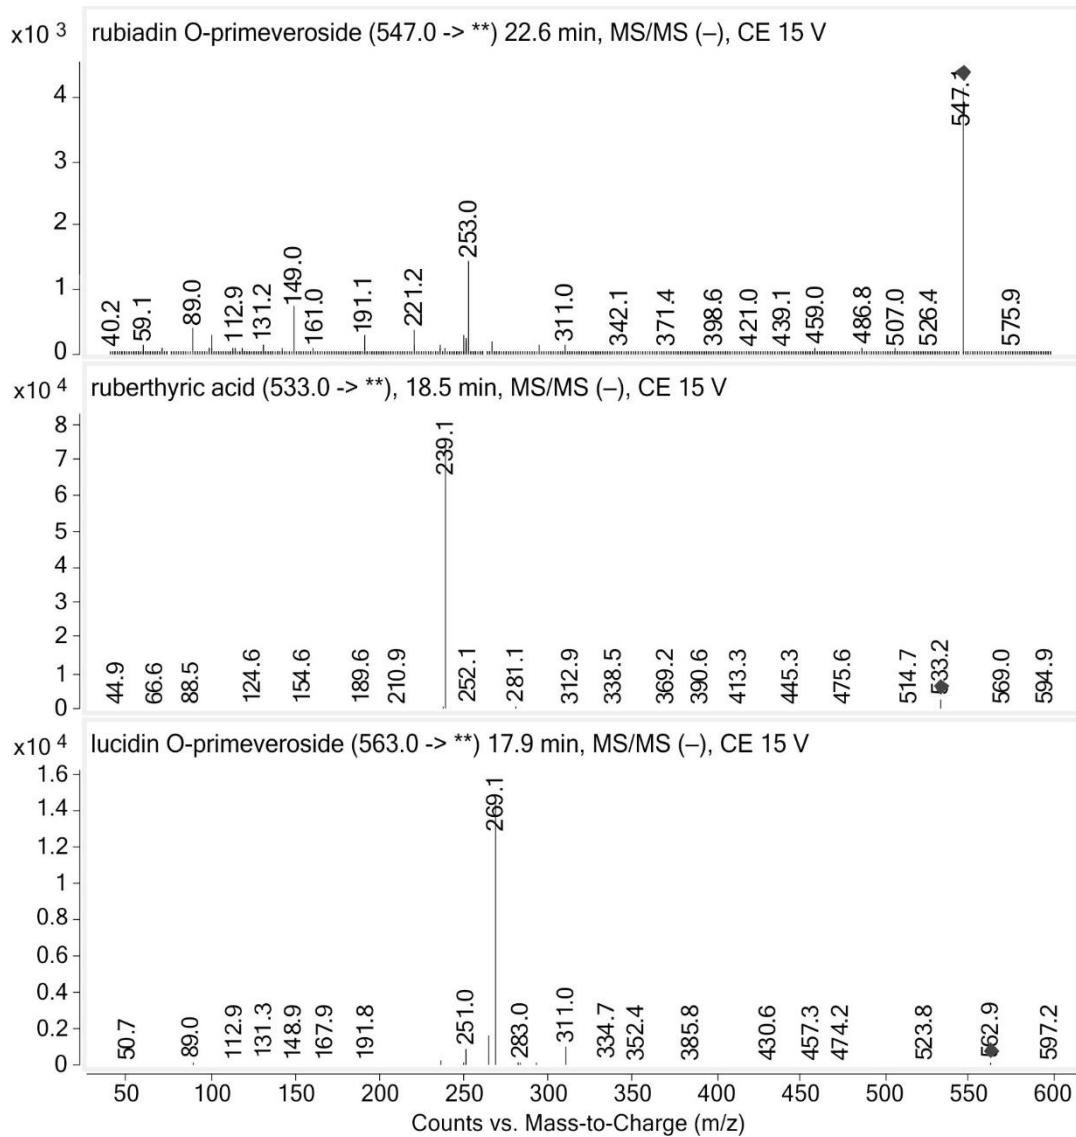

**Figure S5.** Madder: MS/MS spectra of rubiadin O-primeveroside, ruberthyric acid, and lucidin O-primeveroside acquired in negative ion mode

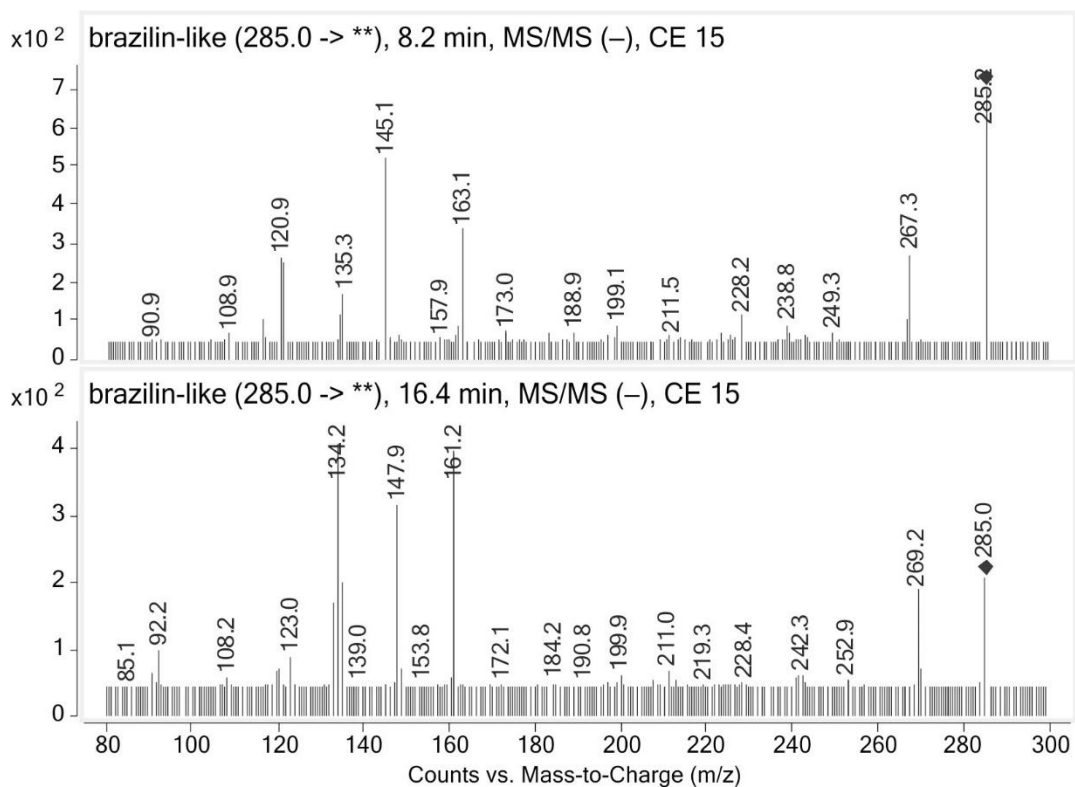

**Figure S6.** Brazilwood: MS/MS spectra of brazilin-like compounds in negative ion mode

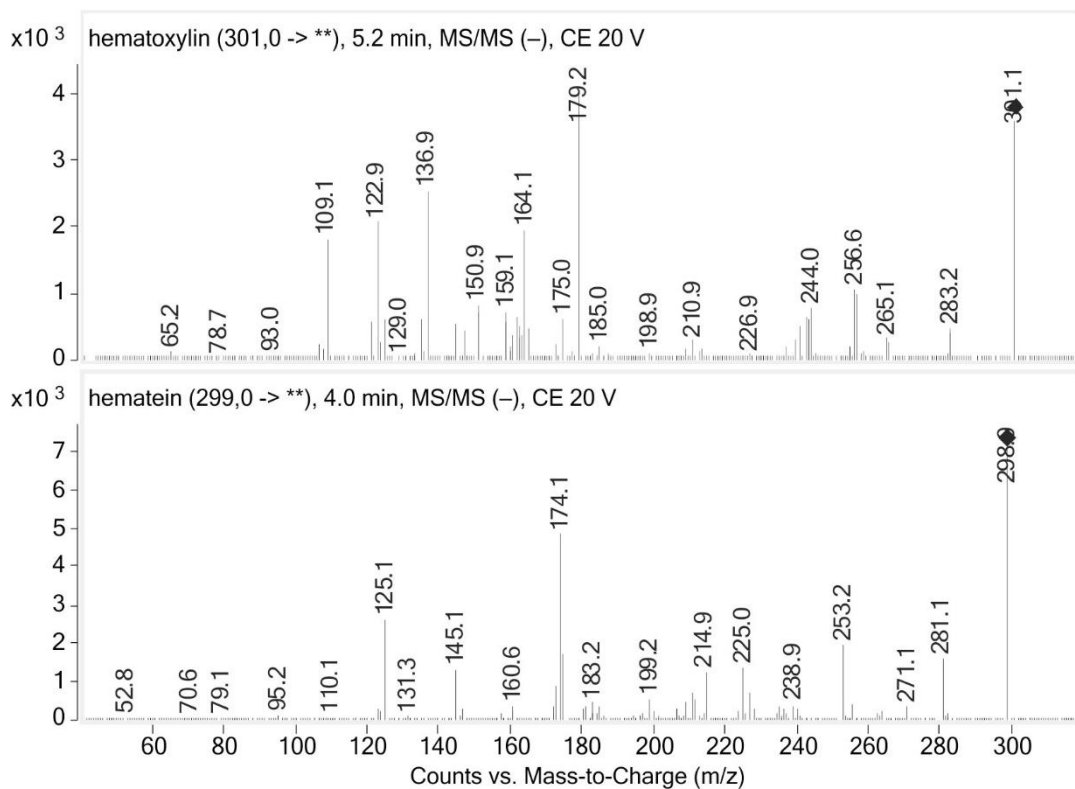

**Figure S7.** Logwood: MS/MS spectra of hematoxylin and hematein acquired in negative ion mode

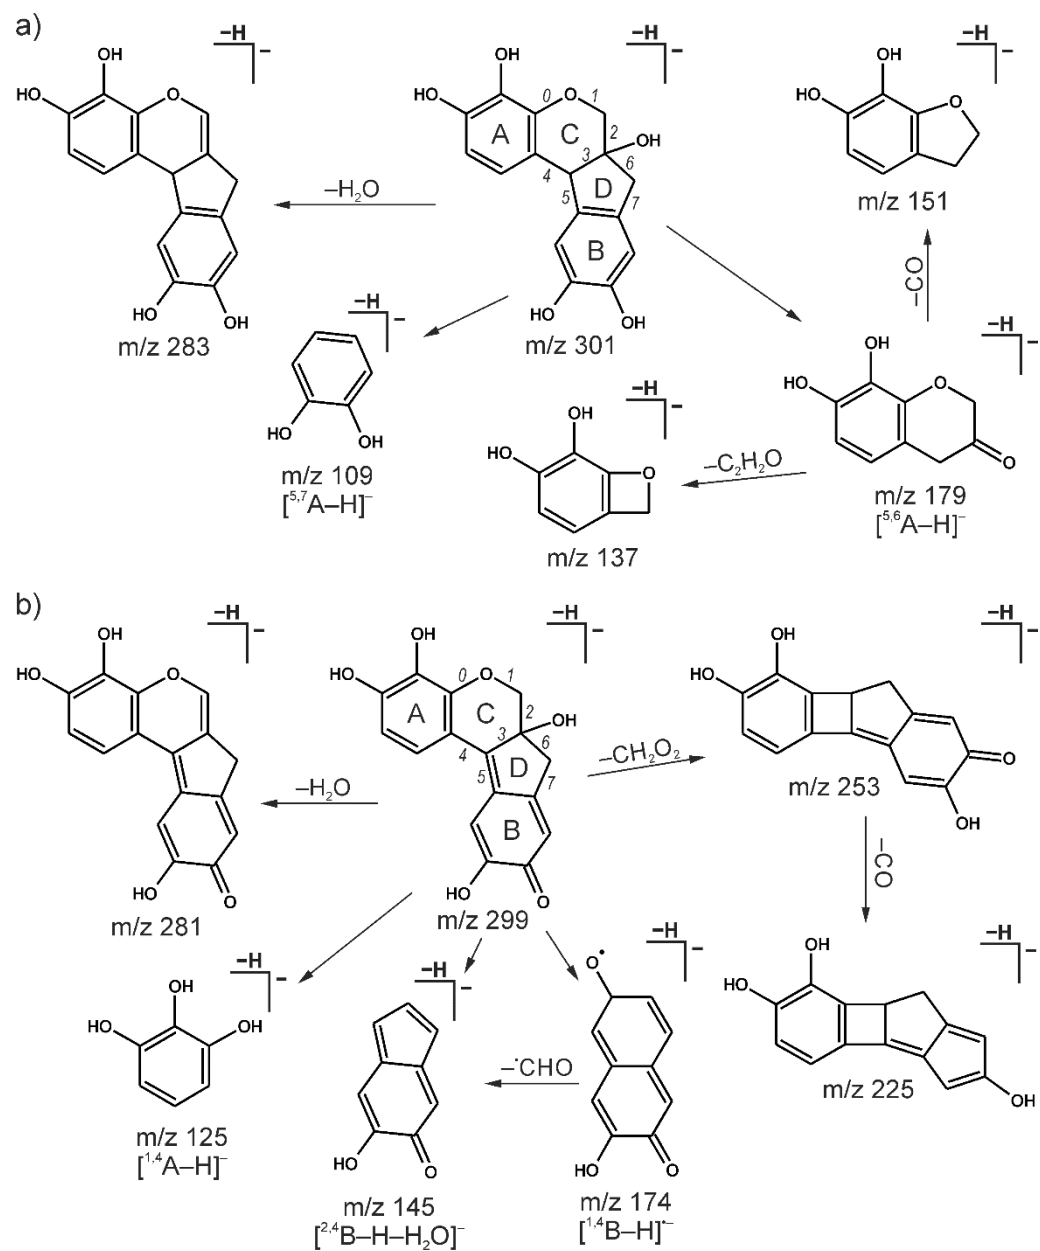

**Figure S8.** Proposed fragmentation pathways for a) hematoxylin and b) hematein

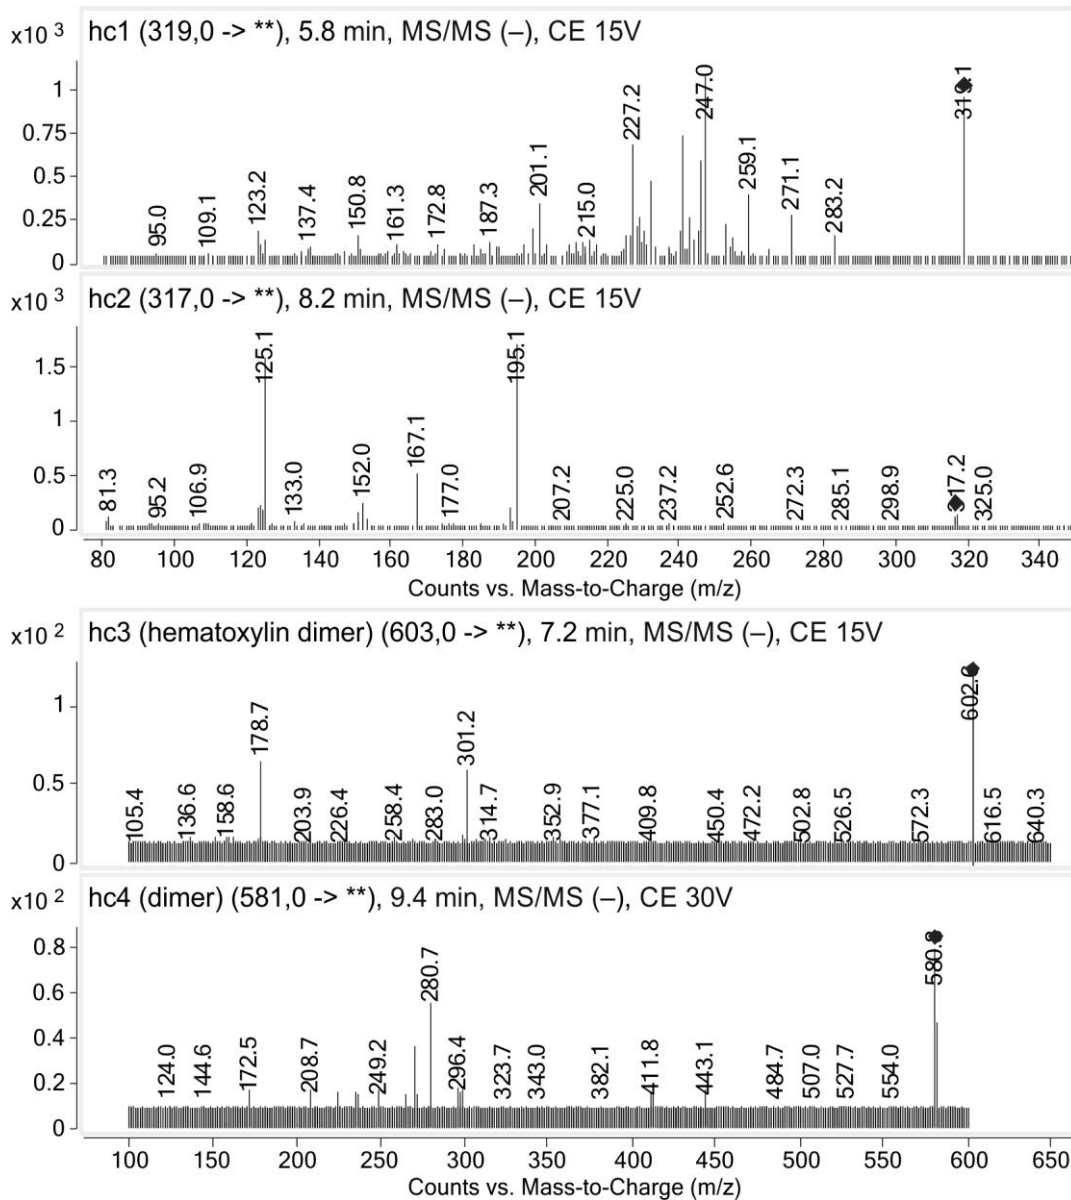

**Figure S9.** Logwood: MS/MS spectra of hc1, hc2, hc3, and hc4 acquired in negative ion mode

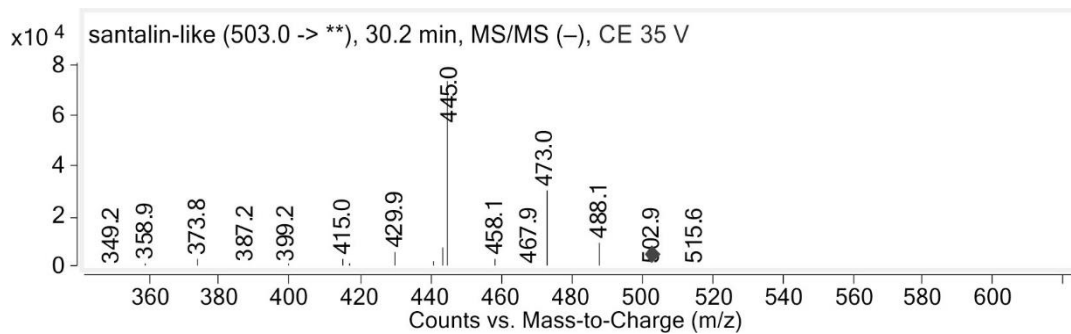

**Figure S10.** Sandalwood: MS/MS spectra of santalin-like compound acquired in negative ion mode



**Table S1.** Compounds and dyes identified in silk textiles dated to the 15th to 17th century.

| Church                                                                                                           | Textile number* | Object*                                                        | Origin and dating*                  | Fiber color | Identified compounds                                                                                                                                                                                                                                                                | Original dye                 | Remarks                 |
|------------------------------------------------------------------------------------------------------------------|-----------------|----------------------------------------------------------------|-------------------------------------|-------------|-------------------------------------------------------------------------------------------------------------------------------------------------------------------------------------------------------------------------------------------------------------------------------------|------------------------------|-------------------------|
| Church of St Michael the Archangel and St Stanislaus Bishop and Martyr (Monastery Church of the Pauline Fathers) | No. 5           | chasuble, part of back orphrey and around-neck-opening textile | Europe, the 15th cent. <sup>1</sup> | red         | pp3, <b>carminic acid</b> , carminic acid derivative, ellagic acid, dcIV, dcVII, pp12, flavokermesic acid, kermesic acid, pp14, pp15                                                                                                                                                | Polish or Armenian cochineal |                         |
| Church of St Michael the Archangel and St Stanislaus Bishop and Martyr (Monastery Church of the Pauline Fathers) | No. 5           | chasuble, part of back orphrey and around-neck-opening textile | Europe, the 15th cent. <sup>1</sup> | red         | laccaic acid E, <b>laccaic acid C</b> , carminic acid, xantholaccaic acid B, <b>laccaic acid B</b> , <b>laccaic acid A</b> , flavokermesic acid                                                                                                                                     | lac dye                      |                         |
| Basilica of Holy Trinity (Monastery Church of the Dominicans)                                                    | No. 7           | stole, main textile                                            | Europe, the 15th cent. <sup>1</sup> | red         | pp3, <b>carminic acid</b> , luteolin 7-O-glc, carminic acid derivative, ellagic acid, dcIV, dcVII, pp12, <b>flavokermesic acid</b> , <b>kermesic acid</b> , pp14, alizarin, pp15, purpurin                                                                                          | Polish or Armenian cochineal |                         |
| Basilica of Holy Trinity (Monastery Church of the Dominicans)                                                    | No. 9           | cope, textile from mantle                                      | Europe, the 15th cent. <sup>1</sup> | red         | pp3, <b>carminic acid</b> , carminic acid derivative, ellagic acid, dcIV, dcVII, pp12, flavokermesic acid, kermesic acid, pp14, pp15                                                                                                                                                | Polish or Armenian cochineal |                         |
| Basilica of Holy Trinity (Monastery Church of the Dominicans)                                                    | No. 13          | dalmatic, front textile and insert in back orphrey             | Europe, the 15th cent. <sup>1</sup> | red         | ellagic acid, <b>flavokermesic acid</b> , <b>kermesic acid</b> , isatin, $\beta/\gamma$ -aminoorcein, $\beta/\gamma$ -aminoorceinimine, <b><math>\alpha</math>-aminoorcein</b> , $\beta/\gamma$ -hydroxyorcein, <b><math>\alpha</math>-hydroxyorcein</b>                            | kermes + orchil              |                         |
| Basilica of Holy Trinity (Monastery Church of the Dominicans)                                                    | No. 14          | dalmatic, textile from back orphrey                            | Europe, the 15th cent. <sup>1</sup> | red         | carminic acid, ellagic acid, <b>flavokermesic acid</b> , <b>kermesic acid</b> , isatin, $\beta/\gamma$ -aminoorcein, $\beta/\gamma$ -aminoorceinimine, <b><math>\alpha</math>-aminoorcein</b> , $\beta/\gamma$ -hydroxyorcein, <b><math>\alpha</math>-hydroxyorcein</b> , indigotin | kermes + orchil              |                         |
| Basilica of Holy Trinity (Monastery Church of the Dominicans)                                                    | No. 15          | chasuble, textile from insert in right-front side              | Europe, the 15th cent. <sup>1</sup> | red         | dcII, <b>carminic acid</b> , carminic acid derivative, ellagic acid, dcIV, dcVII, flavokermesic acid, kermesic acid                                                                                                                                                                 | American cochineal           |                         |
| Church of St Francis of Assisi (Monastery Church of the Franciscans)                                             | No. 16          | stole, outer textile                                           | Europe, the 16th cent. <sup>1</sup> | red         | <b>flavokermesic acid</b> , <b>kermesic acid</b> , <b><math>\alpha</math>-aminoorcein</b> , $\alpha$ -hydroxyorcein                                                                                                                                                                 | kermes + orchil              | traces of synthetic dye |

| Church                                                        | Textile number* | Object*                                             | Origin and dating*                       | Fiber color | Identified compounds                                                                                                                                                                                                                                                                                                                                                                                                                                                    | Original dye                                                       | Remarks                 |
|---------------------------------------------------------------|-----------------|-----------------------------------------------------|------------------------------------------|-------------|-------------------------------------------------------------------------------------------------------------------------------------------------------------------------------------------------------------------------------------------------------------------------------------------------------------------------------------------------------------------------------------------------------------------------------------------------------------------------|--------------------------------------------------------------------|-------------------------|
| Corpus Christi Basilica                                       | No. 17          | chasuble, textile from sides                        | Europe, the 15th cent. <sup>1</sup>      | red/purple  | carminic acid, luteolin 7- <i>O</i> -glc, <b>flavokermesic acid</b> , <b>kermesic acid</b> , $\beta/\gamma$ -aminoorcein, $\beta/\gamma$ -aminoorceinimine, <b><math>\beta/\gamma</math>-aminoorcein</b> , <b><math>\alpha</math>-aminoorcein</b> , $\beta/\gamma$ -hydroxyorcein, $\alpha$ -hydroxyorcein                                                                                                                                                              | kermes + orchil                                                    | traces of synthetic dye |
| Church of the Divine Mercy                                    | No. 18          | chasuble, textile from back orphrey                 | Europe, the 15th cent. <sup>1</sup>      | purple      | dcII, <b>carminic acid</b> , genistin, luteolin 7- <i>O</i> -glc, carminic acid derivative, ellagic acid, dcIV, luteolin, genistein, luteolin methyl ether (1), flavokermesic acid, kermesic acid, biochanin A, isatin, $\beta/\gamma$ -aminoorceinimine, $\beta/\gamma$ -aminoorcein, <b><math>\alpha</math>-aminoorcein</b> , $\alpha$ -hydroxyorcein, <b>indigotin</b> , indirubin                                                                                   | indigo/woad + orchil + American cochineal + traces of dyer's broom |                         |
| Church of the Divine Mercy                                    | No. 18          | chasuble, textile from bottom part of front orphrey | Europe, the 15th cent. <sup>1</sup>      | purple      | luteolin <i>C</i> -hex, carminic acid, <b>genistin</b> , <b>luteolin 7-<i>O</i>-glc</b> , genistein <i>O</i> -hex, luteolin <i>O</i> -hex (2), <b>luteolin</b> , <b>genistein</b> , luteolin methyl ether (1), apigenin, biochanin A, isatin, $\beta/\gamma$ -aminoorcein, $\beta/\gamma$ -aminoorceinimine, $\beta/\gamma$ -aminoorcein, <b><math>\alpha</math>-aminoorcein</b> , $\beta/\gamma$ -hydroxyorcein, $\alpha$ -hydroxyorcein, <b>indigotin</b> , indirubin | indigo/woad + orchil + dyer's broom                                |                         |
| Basilica of Holy Trinity (Monastery Church of the Dominicans) | No. 20          | chasuble, orphrey and around-neck-opening textile   | Europe, the 16th cent. <sup>1</sup>      | red         | carminic acid, ellagic acid, <b>flavokermesic acid</b> , <b>kermesic acid</b> , $\beta/\gamma$ -aminoorcein, $\beta/\gamma$ -aminoorceinimine, $\beta/\gamma$ -aminoorcein, <b><math>\alpha</math>-aminoorcein</b> , $\beta/\gamma$ -hydroxyorcein, <b><math>\alpha</math>-hydroxyorcein</b>                                                                                                                                                                            | kermes + orchil                                                    |                         |
| Church of the Divine Mercy                                    | No. 21          | stole, outer textile                                | Europe, the 15th cent. <sup>1</sup>      | red         | laccaic acid E, <b>laccaic acid C</b> , pp6, xantholaccaic acid B, <b>laccaic acid B</b> , <b>laccaic acid A</b> , flavokermesic acid, isatin, <b>indigotin</b> , indirubin                                                                                                                                                                                                                                                                                             | lac dye + traces of indigo/woad                                    |                         |
| Church of the Divine Mercy                                    | No. 22          | chasuble, textile from middle part of front orphrey | Europe, the 15th cent. <sup>1</sup>      | red         | laccaic acid E, <b>laccaic acid C</b> , pp6, xantholaccaic acid B, <b>laccaic acid B</b> , <b>laccaic acid A</b> , flavokermesic acid, alizarin, purpurin, isatin, <b>indigotin</b>                                                                                                                                                                                                                                                                                     | lac dye + indigo/woad                                              |                         |
| Church of the Divine Mercy                                    | No. 23          | chasuble, textile from upper part of back orphrey   | Europe, the 15th-16th cent. <sup>1</sup> | red         | laccaic acid E, <b>laccaic acid C</b> , pp6, xantholaccaic acid B, <b>laccaic acid B</b> , <b>laccaic acid A</b> , flavokermesic acid, alizarin, purpurin, isatin, <b>indigotin</b>                                                                                                                                                                                                                                                                                     | lac dye + traces of indigo/woad                                    |                         |

| Church                                                                                                           | Textile number* | Object*                                           | Origin and dating*                       | Fiber color | Identified compounds                                                                                                                                                                                                                                                                                                                      | Original dye                                                                     | Remarks                                               |
|------------------------------------------------------------------------------------------------------------------|-----------------|---------------------------------------------------|------------------------------------------|-------------|-------------------------------------------------------------------------------------------------------------------------------------------------------------------------------------------------------------------------------------------------------------------------------------------------------------------------------------------|----------------------------------------------------------------------------------|-------------------------------------------------------|
| Church of the Divine Mercy                                                                                       | No. 24          | chasuble, textile from back sides                 | Europe, the 15th-16th cent. <sup>1</sup> | red         | laccaic acid E, <b>laccaic acid C</b> , pp6, xantholaccaic acid B, <b>laccaic acid B</b> , <b>laccaic acid A</b> , flavokermesic acid, alizarin, purpurin, isatin, <b>indigotin</b>                                                                                                                                                       | lac dye + traces of indigo/woad                                                  |                                                       |
| Church of the Divine Mercy                                                                                       | No. 25          | maniple, textile from endings                     | Europe, the 15th-16th cent. <sup>1</sup> | red         | laccaic acid E, <b>laccaic acid C</b> , pp6, xantholaccaic acid B, <b>laccaic acid B</b> , <b>laccaic acid A</b> , flavokermesic acid, alizarin, purpurin, isatin, <b>indigotin</b>                                                                                                                                                       | lac dye + indigo/woad                                                            |                                                       |
| Church of St Michael the Archangel and St Stanislaus Bishop and Martyr (Monastery Church of the Pauline Fathers) | No. 27          | chasuble, orphrey and around-neck-opening textile | Europe, the 15th-16th cent. <sup>1</sup> | red         | laccaic acid E, <b>laccaic acid C</b> , pp6, xantholaccaic acid B, <b>laccaic acid B</b> , <b>laccaic acid A</b> , flavokermesic acid, alizarin, purpurin, nordamnacanthal                                                                                                                                                                | lac dye                                                                          |                                                       |
| Basilica of Holy Trinity (Monastery Church of the Dominicans)                                                    | No. 28          | stole, main textile                               | Europe, the 15th-16th cent. <sup>1</sup> | red         | laccaic acid E, laccaic acid C, pp6, xantholaccaic acid B, <b>laccaic acid B</b> , <b>laccaic acid A</b> , flavokermesic acid, isatin, indigotin, indirubin                                                                                                                                                                               | lac dye + traces of indigo/woad                                                  |                                                       |
| Basilica of Holy Trinity (Monastery Church of the Dominicans)                                                    | No. 29          | chasuble, textile from sides                      | Europe, the 15th-16th cent. <sup>1</sup> | red         | pp3, <b>carminic acid</b> , carminic acid derivative, <b>ellagic acid</b> , dcIV, dcVII, pp12, flavokermesic acid, kermesic acid, pp14, pp15                                                                                                                                                                                              | Polish or Armenian cochineal + traces of indigo/woad                             | presence of synthetic dye, original fiber color - red |
| Church of the Assumption of the Blessed Virgin Mary (Monastery Church of the Camaldolese Monks)                  | No. 30          | chasuble, textile from sides                      | Europe, the 16th cent. <sup>1</sup>      | purple      | carminic acid, isatin, $\beta/\gamma$ -aminoorcein, $\beta/\gamma$ -aminoorceinimine, $\beta/\gamma$ -aminoorcein, <b><math>\alpha</math>-aminoorcein</b> , <b><math>\beta/\gamma</math>-hydroxyorcein</b> , <b><math>\alpha</math>-hydroxyorcein</b> , <b>indigotin</b>                                                                  | indigo/woad + orchil                                                             |                                                       |
| Church of St Francis of Assisi (Monastery Church of the Franciscans)                                             | No. 33          | chasuble, main textile                            | Europe, the 16th cent. <sup>1</sup>      | red         | carminic acid, luteolin di-O-hex, luteolin 7-O-glc, apigenin 7-O-glc, luteolin, isatin, $\beta/\gamma$ -aminoorcein, $\beta/\gamma$ -aminoorceinimine, <b><math>\beta/\gamma</math>-aminoorcein</b> , <b><math>\alpha</math>-aminoorcein</b> , $\beta/\gamma$ -hydroxyorcein, <b><math>\alpha</math>-hydroxyorcein</b> , <b>indigotin</b> | orchil + indigo/woad + traces of cochineal (of unknown origin) and probably weld |                                                       |

| Church                                                                  | Textile number* | Object*                                | Origin and dating*                  | Fiber color | Identified compounds                                                                                                                                                                                                       | Original dye                       | Remarks                 |
|-------------------------------------------------------------------------|-----------------|----------------------------------------|-------------------------------------|-------------|----------------------------------------------------------------------------------------------------------------------------------------------------------------------------------------------------------------------------|------------------------------------|-------------------------|
| Church of St Catherine of Alexandria                                    | No. 34          | cope, main textile                     | Europe, the 16th cent. <sup>1</sup> | red         | dcII, <b>carminic acid</b> , dcOfka, carminic acid derivative, <b>ellagic acid</b> , dcIV, dcVII, flavokermesic acid, kermesic acid                                                                                        | American cochineal                 |                         |
| Basilica of Holy Trinity (Monastery Church of the Dominicans)           | No. 35          | chasuble, textile from sides           | Europe, the 16th cent. <sup>1</sup> | red         | dcII, <b>carminic acid</b> , carminic acid derivative, ellagic acid, dcIV, dcVII, flavokermesic acid, kermesic acid                                                                                                        | American cochineal                 | traces of synthetic dye |
| Church of St Mark                                                       | No. 36          | chasuble, main textile                 | Europe, the 16th cent. <sup>1</sup> | red         | pp3, <b>carminic acid</b> , carminic acid derivative, ellagic acid, dcIV, dcVII, pp12, flavokermesic acid, <b>kermesic acid</b> , pp14, pp15                                                                               | Polish or Armenian cochineal       |                         |
| Basilica of Holy Trinity (Monastery Church of the Dominicans)           | No. 38          | stole, burse and maniple, main textile | Europe, the 16th cent. <sup>1</sup> | red         | digalloylglucose, trigalloylglucose, tetragalloylglucose (1), tetragalloylglucose (2), dcII, <b>carminic acid</b> , dcOfka, carminic acid derivative, <b>ellagic acid</b> , dcIV, dcVII, flavokermesic acid, kermesic acid | American cochineal                 |                         |
| Church of St Stephen                                                    | No. 38          | chasuble, main textile                 | Europe, the 16th cent. <sup>1</sup> | red         | dcII, <b>carminic acid</b> , carminic acid derivative, ellagic acid, dcIV, dcVII, flavokermesic acid                                                                                                                       | American cochineal                 |                         |
| Corpus Christi Basilica                                                 | No. 41          | chasuble, textile from back orphrey    | Europe, the 16th cent. <sup>1</sup> | red         | dcII, <b>carminic acid</b> , luteolin 7-O-glc, carminic acid derivative, <b>ellagic acid</b> , dcIV, dcVII, luteolin, flavokermesic acid, kermesic acid                                                                    | American cochineal                 |                         |
| Church of St Stephen                                                    | No. 42          | chalice velum and pall, outer textile  | Europe, the 16th cent. <sup>1</sup> | red         | digalloylglucose, dcII, <b>carminic acid</b> , carminic acid derivative, ellagic acid, dcIV, dcVII, flavokermesic acid, kermesic acid                                                                                      | American cochineal                 |                         |
| Corpus Christi Basilica                                                 | No. 44          | chasuble, textile from sides           | Europe, the 16th cent. <sup>1</sup> | red         | digalloylglucose, trigalloylglucose, <b>dcII, carminic acid</b> , dcOfka, carminic acid derivative, <b>ellagic acid</b> , dcIV, dcVII, flavokermesic acid, kermesic acid                                                   | American cochineal + ellagitannins |                         |
| Church of the Conversion of St Paul (Monastery Church of the Lazarists) | No. 45          | chasuble, main textile                 | Europe, the 16th cent. <sup>1</sup> | red         | dcII, <b>carminic acid</b> , carminic acid derivative, ellagic acid, dcIV, dcVII, flavokermesic acid, kermesic acid                                                                                                        | American cochineal                 |                         |
| Church of St Francis of Assisi (Monastery Church of the Franciscans)    | No. 46          | chasuble, textile from sides on back   | Europe, the 16th cent. <sup>1</sup> | red         | dcII, <b>carminic acid</b> , carminic acid derivative, ellagic acid, dcIV, dcVII, flavokermesic acid, kermesic acid                                                                                                        | American cochineal                 |                         |

| Church                                                                                          | Textile number* | Object*                                      | Origin and dating*                  | Fiber color | Identified compounds                                                                                                                                                                                                                            | Original dye                          | Remarks |
|-------------------------------------------------------------------------------------------------|-----------------|----------------------------------------------|-------------------------------------|-------------|-------------------------------------------------------------------------------------------------------------------------------------------------------------------------------------------------------------------------------------------------|---------------------------------------|---------|
| Basilica of Holy Trinity (Monastery Church of the Dominicans)                                   | No. 47          | maniple, main textile                        | Europe, the 16th cent. <sup>1</sup> | red         | dcII, <b>carminic acid</b> , luteolin 7-O-glc, carminic acid derivative, ellagic acid, dcIV, dcVII, flavokermesic acid, kermesic acid                                                                                                           | American cochineal                    |         |
| Basilica of Holy Trinity (Monastery Church of the Dominicans)                                   | No. 49          | stole, main textile                          | Europe, the 16th cent. <sup>1</sup> | red         | dcII, <b>carminic acid</b> , dcOfka, carminic acid derivative, ellagic acid, dcIV, <b>dcVII</b> , flavokermesic acid, kermesic acid                                                                                                             | American cochineal                    |         |
| Basilica of Holy Trinity (Monastery Church of the Dominicans)                                   | No. 49          | dalmatic, main textile                       | Europe, the 16th cent. <sup>1</sup> | red         | dcII, <b>carminic acid</b> , dcOfka, carminic acid derivative, ellagic acid, dcIV, <b>dcVII</b> , flavokermesic acid, kermesic acid                                                                                                             | American cochineal                    |         |
| Church of St Francis of Assisi (Monastery Church of the Franciscans)                            | No. 50          | chasuble, textile from sides on front        | Europe, the 16th cent. <sup>1</sup> | red         | dcII, <b>carminic acid</b> , dcOfka, carminic acid derivative, ellagic acid, dcIV, dcVII, flavokermesic acid, kermesic acid                                                                                                                     | American cochineal                    |         |
| Church of the Assumption of the Blessed Virgin Mary (Monastery Church of the Camaldolese Monks) | No. 51          | chasuble, main textile                       | Europe, the 16th cent. <sup>1</sup> | red         | digalloylglucose, trigalloylglucose, <b>tetragalloylglucose (1)</b> , tetragalloylglucose (2), pentagalloylglucose, dcII, <b>carminic acid</b> , carminic acid derivative, <b>ellagic acid</b> , dcIV, dcVII, flavokermesic acid, kermesic acid | American cochineal + ellagitannins    |         |
| Church of St Andrew (Monastery Church of the Poor Clares)                                       | No. 51          | maniple, main textile                        | Europe, the 16th cent. <sup>1</sup> | red         | digalloylglucose, trigalloylglucose, tetragalloylglucose (1), dcII, <b>carminic acid</b> , dcOfka, carminic acid derivative, <b>ellagic acid</b> , dcIV, dcVII, flavokermesic acid                                                              | American cochineal + ellagitannins    |         |
| Basilica of Holy Trinity (Monastery Church of the Dominicans)                                   | No. 53          | stole, main textile                          | Europe, the 15th cent. <sup>1</sup> | red         | dcII, <b>carminic acid</b> , luteolin 7-O-glc, dcOfka, carminic acid derivative, ellagic acid, dcIV, dcVII, flavokermesic acid, kermesic acid                                                                                                   | American cochineal                    |         |
| Church of St Francis of Assisi (Monastery Church of the Franciscans)                            | No. 55          | chasuble, main textile                       | Europe, the 16th cent. <sup>1</sup> | blue        | isatin, $\alpha$ -aminoorcein, <b>indigotin</b> , indirubin                                                                                                                                                                                     | indigo/woad                           |         |
| Church of St Francis of Assisi (Monastery Church of the Franciscans)                            | No. 56          | chasuble, textile from insert in front sides | Europe, the 16th cent. <sup>1</sup> | blue        | isatin, indigoid compound A, $\alpha$ -aminoorcein, <b>indigotin</b> , indirubin                                                                                                                                                                | indigo/woad                           |         |
| Church of St Francis of Assisi (Monastery Church of the Franciscans)                            | No. 57          | stole and maniple, outer textile             | Europe, the 16th cent. <sup>1</sup> | blue        | <b>luteolin di-O-hex</b> , <b>luteolin 7-O-glc</b> , apigenin 7-O-glc, luteolin O-hex (2), sulfuretin, <b>luteolin</b> , apigenin, diosmetin, isatin, $\beta/\gamma$ -aminoorcein, $\alpha$ -                                                   | indigo/woad + weld + traces of orchil |         |

| Church                                                               | Textile number* | Object*                                              | Origin and dating*                  | Fiber color | Identified compounds                                                                                                                                                                                                                                                                                                                                                                                   | Original dye                       | Remarks                                               |
|----------------------------------------------------------------------|-----------------|------------------------------------------------------|-------------------------------------|-------------|--------------------------------------------------------------------------------------------------------------------------------------------------------------------------------------------------------------------------------------------------------------------------------------------------------------------------------------------------------------------------------------------------------|------------------------------------|-------------------------------------------------------|
|                                                                      |                 |                                                      |                                     |             | <b>aminoorcein</b> , $\alpha$ -hydroxyorcein, <b>indigotin</b> , indirubin                                                                                                                                                                                                                                                                                                                             |                                    |                                                       |
| Church of St Francis of Assisi (Monastery Church of the Franciscans) | No. 58          | stole, main textile                                  | Europe, the 16th cent. <sup>1</sup> | yellow      | digalloylglucose, brazilein, <b>protosappanin B</b> , <b>caes1</b> , <b>caesD</b> , luteolin di- <i>O</i> -hex, <b>urolithin C</b> , <b>luteolin 7-<i>O</i>-glc</b> , ellagic acid, apigenin 7- <i>O</i> -glc, luteolin <i>O</i> -hex, luteolin                                                                                                                                                        | brazilwood + weld + ellagitannins  |                                                       |
| Basilica of Holy Trinity (Monastery Church of the Dominicans)        | No. 60          | chasuble, around-neck-opening textile                | Europe, the 16th cent. <sup>1</sup> | red         | carminic acid, <b>flavokermesic acid</b> , <b>kermesic acid</b> , $\beta/\gamma$ -aminoorcein, $\beta/\gamma$ -aminoorceinimine, $\alpha$ - <b>aminoorcein</b> , $\alpha$ - <b>hydroxyorcein</b>                                                                                                                                                                                                       | kermes + orchil                    |                                                       |
| Basilica of Holy Trinity (Monastery Church of the Dominicans)        | No. 60          | chasuble, textile from sides on back                 | Europe, the 16th cent. <sup>1</sup> | red         | dcII, <b>carminic acid</b> , carminic acid derivative, ellagic acid, dcIV, dcVII, flavokermesic acid, kermesic acid                                                                                                                                                                                                                                                                                    | American cochineal                 | traces of synthetic dyes                              |
| Church of St Peter and St Paul                                       | No. 61          | chasuble, textile from some parts of sides           | Europe, the 16th cent. <sup>1</sup> | red         | digalloylglucose, trigalloylglucose, <b>carminic acid</b> , carminic acid derivative, <b>ellagic acid</b> , dcIV, dcVII, flavokermesic acid, kermesic acid                                                                                                                                                                                                                                             | American cochineal + ellagitannins | presence of synthetic dye, original fiber color - red |
| Corpus Christi Basilica                                              | No. 62          | chasuble, textile from orphrey and right arm on back | Europe, the 16th cent. <sup>1</sup> | red         | <b>digalloylglucose</b> , <b>trigalloylglucose</b> , <b>tetragalloylglucose (1)</b> , tetragalloylglucose (2), dcII, <b>carminic acid</b> , dcOfka, carminic acid derivative, <b>ellagic acid</b> , dcIV, dcVII, flavokermesic acid, kermesic acid,                                                                                                                                                    | American cochineal + ellagitannins |                                                       |
| Corpus Christi Basilica                                              | No. 63          | chasuble, textile from inserts of front sides        | Europe, the 16th cent. <sup>1</sup> | red         | digalloylglucose, dcII, <b>carminic acid</b> , dcOfka, carminic acid derivative, <b>ellagic acid</b> , dcIV, dcVII, flavokermesic acid, kermesic acid                                                                                                                                                                                                                                                  | American cochineal                 | traces of synthetic dye                               |
| Church of St Mark                                                    | No. 63          | burse, main textile                                  | Europe, the 16th cent. <sup>1</sup> | red         | <b>carminic acid</b> , carminic acid derivative, ellagic acid, dcIV, dcVII                                                                                                                                                                                                                                                                                                                             | American cochineal                 |                                                       |
| Church of St Francis of Assisi (Monastery Church of the Franciscans) | No. 66          | chasuble, main textile                               | Europe, the 16th cent. <sup>1</sup> | red         | carminic acid, <b>luteolin di-<i>O</i>-hex</b> , <b>luteolin 7-<i>O</i>-glc</b> , apigenin 7- <i>O</i> -glc, luteolin <i>O</i> -hex (2), luteolin, apigenin, diosmetin, isatin, $\beta/\gamma$ -aminoorcein, $\beta/\gamma$ -aminoorceinimine, $\beta/\gamma$ - <b>aminoorcein</b> , $\alpha$ - <b>aminoorcein</b> , $\beta/\gamma$ -hydroxyorcein, $\alpha$ - <b>hydroxyorcein</b> , <b>indigotin</b> | orchil + weld + indigo/woad        |                                                       |

| Church                                                        | Textile number* | Object*                                       | Origin and dating*                                    | Fiber color | Identified compounds                                                                                                                                             | Original dye                                                                                         | Remarks                                               |
|---------------------------------------------------------------|-----------------|-----------------------------------------------|-------------------------------------------------------|-------------|------------------------------------------------------------------------------------------------------------------------------------------------------------------|------------------------------------------------------------------------------------------------------|-------------------------------------------------------|
| Basilica of Holy Trinity (Monastery Church of the Dominicans) | No. 67          | cope, textile from orphrey and hood           | Europe, the 15th cent. <sup>1</sup>                   | red         | dcII, <b>carminic acid</b> , carminic acid derivative, ellagic acid, dcIV, dcVII, flavokermesic acid, kermesic acid                                              | American cochineal                                                                                   |                                                       |
| Corpus Christi Basilica                                       | No. 68          | chasuble, textile from orphrey and back sides | Europe, the 16th cent. <sup>1</sup>                   | red         | dcII, <b>carminic acid</b> , luteolin 7-O-glc, carminic acid derivative, ellagic acid, dcIV, dcVII, flavokermesic acid, kermesic acid                            | American cochineal                                                                                   |                                                       |
| Basilica of Holy Trinity (Monastery Church of the Dominicans) | No. 71          | parura, lining                                | Europe, the 16 <sup>th</sup> -17th cent. <sup>1</sup> | red         | dcII, <b>carminic acid</b> , carminic acid derivative, ellagic acid, dcIV, dcVII, flavokermesic acid, kermesic acid                                              | American cochineal                                                                                   |                                                       |
| Basilica of Holy Trinity (Monastery Church of the Dominicans) | No. 73          | stole, textile from band                      | Europe, the 16th cent. <sup>1</sup>                   | red         | <b>carminic acid</b> , carminic acid derivative, <b>ellagic acid</b> , dcIV, dcVII, kermesic acid                                                                | American cochineal                                                                                   | presence of synthetic dye, original fiber color - red |
| Basilica of Holy Trinity (Monastery Church of the Dominicans) | No. 73          | chalice velum, main textile                   | Europe, the 16th cent. <sup>1</sup>                   | red         | <b>carminic acid</b> , carminic acid derivative, ellagic acid, dcIV, dcVII                                                                                       | American cochineal                                                                                   | presence of synthetic dye, original fiber color - red |
| Church of St Andrew (Monastery Church of the Poor Clares)     | No. 74          | maniple, outer textile                        | Europe, the 16th cent. <sup>1</sup>                   | red         | dcII, <b>carminic acid</b> , carminic acid derivative, dcIV, dcVII                                                                                               | American cochineal                                                                                   |                                                       |
| Church of St Adalbert                                         | No. 75          | maniple, outer textile                        | Europe, the 16th cent. <sup>1</sup>                   | red         | pp3, <b>carminic acid</b> , carminic acid derivative, ellagic acid, dcIV, dcVII, pp12, flavokermesic acid, <b>kermesic acid</b> , pp14, alizarin, pp15, purpurin | Polish or Armenian cochineal + traces of <i>Rubiaceae</i> dye plant (probably <i>Galium</i> species) |                                                       |

| Church                                                                                   | Textile number* | Object*                                              | Origin and dating*                  | Fiber color     | Identified compounds                                                                                                                                                                                                                                   | Original dye                       | Remarks                  |
|------------------------------------------------------------------------------------------|-----------------|------------------------------------------------------|-------------------------------------|-----------------|--------------------------------------------------------------------------------------------------------------------------------------------------------------------------------------------------------------------------------------------------------|------------------------------------|--------------------------|
| Basilica of Holy Trinity (Monastery Church of the Dominicans)                            | No. 76          | chasuble, textile from sides                         | Europe, the 16th cent. <sup>1</sup> | red             | dcII, <b>carminic acid</b> , carminic acid derivative, <b>ellagic acid</b> , dcIV, dcVII, flavokermesic acid, kermesic acid                                                                                                                            | American cochineal                 | traces of synthetic dyes |
| Corpus Christi Basilica                                                                  | No. 78          | chasuble, textile from inserts of front sides        | Europe, the 16th cent. <sup>1</sup> | red             | <b>flavokermesic acid</b> , <b>kermesic acid</b> , $\beta/\gamma$ -aminoorcein, $\beta/\gamma$ -aminoorceinimine, $\beta/\gamma$ - <b>aminoorcein</b> , $\alpha$ - <b>aminoorcein</b> , $\beta/\gamma$ -hydroxyorcein, $\alpha$ - <b>hydroxyorcein</b> | kermes + orchil                    | traces of synthetic dye  |
| Corpus Christi Basilica                                                                  | No. 81          | chalice velum, outer textile                         | Europe, the 16th cent. <sup>1</sup> | red             | digalloylglucose, caesD, dcII, <b>carminic acid</b> , dcOfka, carminic acid derivative, ellagic acid, dcIV, dcVII, flavokermesic acid, kermesic acid                                                                                                   | American cochineal + ellagitannins | traces of synthetic dyes |
| Church of St Mark                                                                        | No. 82          | chasuble, textile from front sides and on back       | Europe, the 16th cent. <sup>1</sup> | red             | digalloylglucose, dcII, <b>carminic acid</b> , carminic acid derivative, ellagic acid, dcIV, dcVII, flavokermesic acid                                                                                                                                 | American cochineal + ellagitannins |                          |
| Church of St Stephen                                                                     | No. 83          | chasuble, main textile                               | Europe, the 16th cent. <sup>1</sup> | red             | dcII, <b>carminic acid</b> , carminic acid derivative, ellagic acid, dcIV, dcVII, flavokermesic acid, kermesic acid                                                                                                                                    | American cochineal                 |                          |
| Church of St Francis of Assisi (Monastery Church of the Franciscans)                     | No. 85          | chasuble, textile from orphrey                       | Europe, the 16th cent. <sup>1</sup> | red             | dcII, <b>carminic acid</b> , carminic acid derivative, <b>ellagic acid</b> , dcIV, dcVII, flavokermesic acid, kermesic acid                                                                                                                            | American cochineal                 |                          |
| Church of St Francis of Assisi (Monastery Church of the Franciscans)                     | No. 86          | stole, outer textile                                 | Europe, the 16th cent. <sup>1</sup> | red             | dcII, <b>carminic acid</b> , carminic acid derivative, ellagic acid, dcIV, dcVII, flavokermesic acid, kermesic acid                                                                                                                                    | American cochineal                 |                          |
| Church of the Visitation of the Blessed Virgin Mary (Monastery Church of the Carmelites) | No. 93          | chasuble, textile from sides                         | N/A, the 17th cent. <sup>2</sup>    | red/<br>/purple | dcII, <b>carminic acid</b> , carminic acid derivative, <b>ellagic acid</b> , dcIV, dcVII, flavokermesic acid                                                                                                                                           | American cochineal                 |                          |
| Church of St Joseph (Monastery Church of the Bernardine Nuns)                            | No. 97          | chalice velum and burse, outer textile               | Europe, the 17th cent. <sup>2</sup> | red             | dcII, <b>carminic acid</b> , dcOfka, carminic acid derivative, ellagic acid, dcIV, dcVII, flavokermesic acid, kermesic acid                                                                                                                            | American cochineal                 |                          |
| Basilica of Holy Trinity (Monastery Church of the Dominicans)                            | No. 98          | bandera with the vision of St Jack, insert in pelmet | Europe, the 17th cent. <sup>2</sup> | red             | <b>carminic acid</b> , carminic acid derivative, ellagic acid, dcIV, dcVII                                                                                                                                                                             | cochineal (of unknown origin)      |                          |
| Church of the Visitation of the Blessed Virgin Mary                                      | No. 99          | chasuble, main textile                               | N/A, the 17th cent. <sup>2</sup>    | red/<br>/purple | dcII, <b>carminic acid</b> , carminic acid derivative, dcIV, dcVII                                                                                                                                                                                     | American cochineal                 |                          |



| Church                                                                                          | Textile number* | Object*                                                | Origin and dating*                  | Fiber color | Identified compounds                                                                                                                                                                                                                                                                                       | Original dye                                               | Remarks                  |
|-------------------------------------------------------------------------------------------------|-----------------|--------------------------------------------------------|-------------------------------------|-------------|------------------------------------------------------------------------------------------------------------------------------------------------------------------------------------------------------------------------------------------------------------------------------------------------------------|------------------------------------------------------------|--------------------------|
| (Monastery Church of the Carmelites)                                                            |                 |                                                        |                                     |             |                                                                                                                                                                                                                                                                                                            |                                                            |                          |
| Church of St Peter and St Paul                                                                  | No. 103         | maniple, main textile                                  | Europe, the 17th cent.              | red         | digalloylglucose, dcII, <b>carminic acid</b> , dcOfka, carminic acid derivative, ellagic acid, dcIV, dcVII, flavokermesic acid, kermesic acid                                                                                                                                                              | American cochineal + ellagotannins + traces of indigo/woad | traces of synthetic dye  |
| Basilica of Holy Trinity (Monastery Church of the Dominicans)                                   | No. 104         | bandera with the vision of St Jack, background textile | Europe, the 17th cent.              | red         | <b>carminic acid</b> , carminic acid derivative, ellagic acid, dcIV, dcVII                                                                                                                                                                                                                                 | cochineal (of unknown origin)                              |                          |
| Church of St Francis of Assisi (Monastery Church of the Franciscans)                            | No. 108         | chasuble, textile from front orphrey                   | Europe, the 17th cent.              | red         | dcII, <b>carminic acid</b> , dcOfka, carminic acid derivative, <b>ellagic acid</b> , dcIV, dcVII, flavokermesic acid, kermesic acid                                                                                                                                                                        | American cochineal                                         |                          |
| Church of the Assumption of the Blessed Virgin Mary (Monastery Church of the Camaldolese Monks) | No. 111         | chasuble, main textile                                 | Europe, the 17th cent.              | purple      | <b>hematein</b> , caesD, carminic acid, <b>caesC</b> , isatin, $\beta/\gamma$ -aminoorcein, $\beta/\gamma$ -aminoorceinimine, $\beta/\gamma$ -aminoorcein, <b><math>\alpha</math>-aminoorcein</b> , $\beta/\gamma$ -hydroxyorcein, <b><math>\alpha</math>-hydroxyorcein</b> , <b>indigotin</b> , indirubin | indigo/woad + orchil + traces of logwood                   |                          |
| Basilica of Holy Trinity (Monastery Church of the Dominicans)                                   | No. 115         | chasuble, textile from sides                           | Europe, the 17th cent. <sup>2</sup> | red         | <b>dcII</b> , <b>carminic acid</b> , dcOfka, carminic acid derivative, ellagic acid, dcIV, dcVII, flavokermesic acid, kermesic acid                                                                                                                                                                        | American cochineal                                         | traces of synthetic dyes |
| Church of St Stephen                                                                            | No. 117         | chasuble, textile from sides                           | Europe, the 17th cent. <sup>2</sup> | red         | dcII, <b>carminic acid</b> , carminic acid derivative, ellagic acid, dcIV, dcVII                                                                                                                                                                                                                           | American cochineal                                         |                          |
| Church of St Casimir the Prince (Monastery Church of the Reformed Franciscans)                  | No. 117         | chasuble, textile from sides                           | Europe, the 17th cent. <sup>2</sup> | red         | <b>carminic acid</b> , carminic acid derivative, dcIV, dcVII, kermesic acid                                                                                                                                                                                                                                | American cochineal                                         |                          |
| Basilica of Holy Trinity (Monastery Church of the Dominicans)                                   | No. 119         | chasuble, textile from back orphrey                    | Europe, the 17th cent. <sup>2</sup> | red         | <b>dcII</b> , <b>carminic acid</b> , carminic acid derivative, ellagic acid, dcIV, dcVII, flavokermesic acid, kermesic acid                                                                                                                                                                                | American cochineal                                         |                          |
| Basilica of Holy Trinity (Monastery Church of the Dominicans)                                   | No. 119         | chasuble, back orphrey and around-neck-opening textile | Europe, the 17th cent. <sup>2</sup> | red         | <b>dcII</b> , <b>carminic acid</b> , dcOfka, carminic acid derivative, ellagic acid, dcIV, dcVII, <b>flavokermesic acid</b> , kermesic acid                                                                                                                                                                | American cochineal                                         |                          |

| Church                                                                                              | Textile number* | Object*                                                          | Origin and dating*                  | Fiber color | Identified compounds                                                                                                                                                                                                                                      | Original dye                               | Remarks |
|-----------------------------------------------------------------------------------------------------|-----------------|------------------------------------------------------------------|-------------------------------------|-------------|-----------------------------------------------------------------------------------------------------------------------------------------------------------------------------------------------------------------------------------------------------------|--------------------------------------------|---------|
| Church of St Francis of Assisi (Monastery Church of the Franciscans)                                | No. 121         | chasuble, textile from back orphrey                              | Europe, the 17th cent. <sup>2</sup> | red         | digalloylglucose, trigalloylglucose, tetragalloylglucose (1), caesD, dcII, <b>carminic acid</b> , caesC, dcOfka, carminic acid derivative, <b>ellagic acid</b> , dcIV, dcVII, flavokermesic acid, kermesic acid                                           | American cochineal + traces of brazilwood  |         |
| Church of St Francis of Assisi (Monastery Church of the Franciscans)                                | No. 122         | chasuble, textile from sides and around-neck-opening             | Europe, the 17th cent. <sup>2</sup> | red         | dcII, <b>carminic acid</b> , dcOfka, carminic acid derivative, <b>ellagic acid</b> , dcIV, dcVII, flavokermesic acid, kermesic acid                                                                                                                       | American cochineal                         |         |
| Church of St Francis of Assisi (Monastery Church of the Franciscans)                                | No. 123         | chasuble, textile from front, back sides and around-neck-opening | Europe, the 17th cent. <sup>2</sup> | red         | dcII, <b>carminic acid</b> , dcOfka, carminic acid derivative, <b>ellagic acid</b> , dcIV, dcVII, flavokermesic acid, kermesic acid                                                                                                                       | American cochineal                         |         |
| Church of the Assumption of the Holy Mother and St Venceslaus (Monastery Church of the Cistercians) | No. 124         | chasuble, main textile                                           | Europe, the 17th cent. <sup>2</sup> | red         | dcII, <b>carminic acid</b> , carminic acid derivative, <b>ellagic acid</b> , dcIV, dcVII, flavokermesic acid, kermesic acid, isatin, indigotin                                                                                                            | American cochineal + traces of indigo/woad |         |
| Church of St Francis of Assisi (Monastery Church of the Franciscans)                                | No. 124         | chasuble, textile from back orphrey                              | Europe, the 17th cent. <sup>2</sup> | red         | dcII, <b>carminic acid</b> , dcOfka, carminic acid derivative, <b>ellagic acid</b> , dcIV, dcVII, flavokermesic acid, kermesic acid                                                                                                                       | American cochineal                         |         |
| Church of St Joseph (Monastery Church of the Bernardine Nuns)                                       | No. 125         | chasuble, textile from sides                                     | Europe, the 17th cent. <sup>2</sup> | red         | dcII, <b>carminic acid</b> , carminic acid derivative, <b>ellagic acid</b> , dcIV, dcVII, flavokermesic acid, kermesic acid                                                                                                                               | American cochineal                         |         |
| Church of St Mark                                                                                   | No. 126         | chasuble, around-neck-opening textile                            | Europe, the 17th cent. <sup>2</sup> | red         | digalloylglucose, dcII, <b>carminic acid</b> , carminic acid derivative, ellagic acid, dcIV, dcVII, flavokermesic acid                                                                                                                                    | American cochineal                         |         |
| Church of St Joseph (Monastery Church of the Bernardine Nuns)                                       | No. 129         | chasuble, textile from sides                                     | Europe, the 17th cent. <sup>2</sup> | red         | digalloylglucose, dcII, <b>carminic acid</b> , dcOfka, carminic acid derivative, ellagic acid, dcIV, dcVII, flavokermesic acid, kermesic acid                                                                                                             | American cochineal + ellagotannins         |         |
| Basilica of Holy Trinity (Monastery Church of the Dominicans)                                       | No. 130         | chasuble, around-neck-opening textile                            | Europe, the 17th cent. <sup>2</sup> | red         | <b>genistin</b> , <b>luteolin 7-O-glc</b> , genistein O-hex, luteolin O-hex (1), <b>apigenin 7-O-glc</b> , luteolin O-hex (2), <b>luteolin</b> , <b>genistin</b> , luteolin methyl ether (1), apigenin, biochanin A, isatin, <b>indigotin</b> , indirubin | American cochineal + traces of indigo/woad |         |

| Church                                                           | Textile number* | Object*                                                       | Origin and dating*                  | Fiber color          | Identified compounds                                                                                                                                                                                                                                                                                                                                                                          | Original dye                              | Remarks                                                   |
|------------------------------------------------------------------|-----------------|---------------------------------------------------------------|-------------------------------------|----------------------|-----------------------------------------------------------------------------------------------------------------------------------------------------------------------------------------------------------------------------------------------------------------------------------------------------------------------------------------------------------------------------------------------|-------------------------------------------|-----------------------------------------------------------|
| Church of St Andrew<br>(Monastery Church of the Poor Clares)     | No. 131         | chasuble, piece of textile                                    | Europe, the 17th cent. <sup>2</sup> | red                  | digalloylglucose, <b>dcII, <u>carminic acid</u></b> , dcOfka, carminic acid derivative, ellagic acid, dcIV, dcVII, flavokermesic acid                                                                                                                                                                                                                                                         | American cochineal + ellagotannins        |                                                           |
| Basilica of Holy Trinity<br>(Monastery Church of the Dominicans) | No. 132         | chasuble, front inserts in arms                               | Europe, the 17th cent. <sup>2</sup> | red                  | <b>dcII, <u>carminic acid</u></b> , dcOfka, carminic acid derivative, ellagic acid, dcIV, dcVII, <b>flavokermesic acid</b> , kermesic acid                                                                                                                                                                                                                                                    | American cochineal                        |                                                           |
| Church of St Peter and St Paul                                   | No. 135         | chasuble, main textile                                        | Europe, the 17th cent. <sup>2</sup> | red                  | dcII, <b>carminic acid</b> , dcOfka, carminic acid derivative, ellagic acid, dcIV, dcVII, flavokermesic acid, kermesic acid                                                                                                                                                                                                                                                                   | American cochineal                        |                                                           |
| Corpus Christi Basilica                                          | No. 136         | chalice velum, outer textile                                  | Europe, the 17th cent. <sup>2</sup> | blue with purple hue | dcII, <b>carminic acid</b> , luteolin di-O-hex, luteolin 7-O-glc, dcIV, dcVII, flavokermesic acid, kermesic acid, alizarin, xanthopurpurin, purpurin, isatin, $\beta/\gamma$ -aminoorcein, $\beta/\gamma$ -aminoorceinimine, $\beta/\gamma$ -aminoorcein, <b><math>\alpha</math>-aminoorcein</b> , $\beta/\gamma$ -hydroxyorcein, <b><math>\alpha</math>-hydroxyorcein</b> , <b>indigotin</b> | orchil + American cochineal + indigo/woad | presence of synthetic dyes, original fiber color - purple |
| Basilica of Holy Trinity<br>(Monastery Church of the Dominicans) | No. 138         | pall, main textile                                            | Europe, the 17th cent. <sup>2</sup> | blue                 | isatin, $\beta/\gamma$ -aminoorcein, $\alpha$ -aminoorcein, $\alpha$ -hydroxyorcein, isatin, <b>indigotin</b> , indirubin                                                                                                                                                                                                                                                                     | indigo/woad + orchil                      |                                                           |
| Church of St Andrew<br>(Monastery Church of the Poor Clares)     | No. 141         | chasuble, textile from sides                                  | Europe, the 17th cent. <sup>2</sup> | red                  | digalloylglucose, trigalloylglucose, tetragalloylglucose (1), dcII, <b>carminic acid</b> , carminic acid derivative, <b>ellagic acid</b> , dcIV, dcVII                                                                                                                                                                                                                                        | American cochineal + ellagotannins        |                                                           |
| Church of St Andrew<br>(Monastery Church of the Poor Clares)     | No. 142         | chasuble, textile from sides                                  | Europe, the 17th cent. <sup>2</sup> | red                  | dcII, <b>carminic acid</b> , carminic acid derivative, dcIV, dcVII                                                                                                                                                                                                                                                                                                                            | American cochineal                        |                                                           |
| Basilica of Holy Trinity<br>(Monastery Church of the Dominicans) | No. 144         | chasuble, textile from orphrey and upper parts of front sides | Europe, the 17th cent. <sup>2</sup> | purple               | dcII, <b>carminic acid</b> , carminic acid derivative, dcIV, dcVII, flavokermesic acid, kermesic acid, isatin, $\beta/\gamma$ -aminoorcein, $\beta/\gamma$ -aminoorceinimine, $\beta/\gamma$ -aminoorcein, <b><math>\alpha</math>-aminoorcein</b> , $\beta/\gamma$ -hydroxyorcein, <b><math>\alpha</math>-hydroxyorcein</b> , <b>indigotin</b> , indirubin                                    | indigo/woad + American cochineal + orchil |                                                           |
| Basilica of Holy Trinity<br>(Monastery Church of the Dominicans) | No. 144         | burse and maniple, main textile                               | Europe, the 17th cent. <sup>2</sup> | blue                 | isatin, <b><math>\alpha</math>-aminoorcein</b> , <b><math>\alpha</math>-hydroxyorcein</b> , <b>indigotin</b>                                                                                                                                                                                                                                                                                  | indigo/woad + orchil                      |                                                           |

| Church                                                                                          | Textile number* | Object*                                             | Origin and dating*                  | Fiber color | Identified compounds                                                                                                                                                                                                                                                                                                                                                                                     | Original dye                                        | Remarks                                                         |
|-------------------------------------------------------------------------------------------------|-----------------|-----------------------------------------------------|-------------------------------------|-------------|----------------------------------------------------------------------------------------------------------------------------------------------------------------------------------------------------------------------------------------------------------------------------------------------------------------------------------------------------------------------------------------------------------|-----------------------------------------------------|-----------------------------------------------------------------|
| Church of the Visitation of the Blessed Virgin Mary (Monastery Church of the Carmelites)        | No. 147         | chasuble, textile from sides                        | N/A, the 17th cent. <sup>2</sup>    | red         | caesD, dcII, <b>carminic acid</b> , caesC, carminic acid derivative, dcIV, dcVII                                                                                                                                                                                                                                                                                                                         | American cochineal + traces of brazilwood           |                                                                 |
| Church of St Peter and St Paul                                                                  | No. 149         | chasuble, main textile                              | Europe, the 17th cent. <sup>2</sup> | red         | protosappanin B, caes1, caesD, dcII, <b>carminic acid</b> , caesC, carminic acid derivative, ellagic acid, dcIV, dcVII, flavokermesic acid, kermesic acid                                                                                                                                                                                                                                                | American cochineal + traces of brazilwood           | presence of synthetic dye, original fiber color - red           |
| Church of the Visitation of the Blessed Virgin Mary (Monastery Church of the Carmelites)        | No. 150         | chasuble and dalmatic, main textile                 | N/A, the 17th cent. <sup>2</sup>    | red         | <b>digalloylglucose</b> , <b>trigalloylglucose</b> , tetragalloylglucose (1), dcII, <b>carminic acid</b> , dcOfka, carminic acid derivative, <b>ellagic acid</b> , dcIV, dcVII, flavokermesic acid                                                                                                                                                                                                       | American cochineal + ellagotannins                  |                                                                 |
| Church of St Andrew (Monastery Church of the Poor Clares)                                       | No. 152         | dalmatic, textile from orphrey and sleeves          | Europe, the 17th cent. <sup>2</sup> | red         | digalloylglucose, dcII, <b>carminic acid</b> , carminic acid derivative, dcIV, dcVII, <b>bixin</b>                                                                                                                                                                                                                                                                                                       | American cochineal + annatto                        |                                                                 |
| Church of St Peter and St Paul                                                                  | No. 153         | dalmatic, main textile                              | Europe, the 17th cent. <sup>2</sup> | red         | dcII, <b>carminic acid</b> , dcOfka, carminic acid derivative, ellagic acid, dcIV, dcVII, flavokermesic acid, kermesic acid                                                                                                                                                                                                                                                                              | American cochineal                                  |                                                                 |
| Church of the Conversion of St Paul (Monastery Church of the Lazarists)                         | No. 154         | cope, textile from insert in mantle (along orphrey) | Europe, the 17th cent. <sup>2</sup> | red         | caesD, dcII, <b>carminic acid</b> , caesC, carminic acid derivative, dcIV, dcVII                                                                                                                                                                                                                                                                                                                         | American cochineal                                  | traces of synthetic dyes                                        |
| Church of St Peter and St Paul                                                                  | No. 155         | chasuble, orphrey textile                           | Europe, the 17th cent. <sup>2</sup> | red         | brazilein, <b>protosappanin B</b> , caes1, <b>caesD</b> , dcII, <b>carminic acid</b> , <b>caesC</b> , caes2, $\beta/\gamma$ -aminoorcein, $\beta/\gamma$ -aminoorceinimine, $\beta/\gamma$ -aminoorcein, <b><math>\alpha</math>-aminoorcein</b> , $\beta/\gamma$ -hydroxyorcein, <b><math>\alpha</math>-hydroxyorcein</b>                                                                                | brazilwood + orchil + cochineal (of unknown origin) | presence of synthetic dye, original fiber color - red or orange |
| Church of the Assumption of the Blessed Virgin Mary (Monastery Church of the Camaldolese Monks) | No. 156         | chasuble, textile from sides                        | N/A, the 17th cent. <sup>2</sup>    | red         | caesD, dcII, <b>carminic acid</b> , caesC, carminic acid derivative, ellagic acid, dcIV, dcVII, flavokermesic acid, kermesic acid, isatin, $\beta/\gamma$ -aminoorcein, $\beta/\gamma$ -aminoorceinimine, $\beta/\gamma$ -aminoorcein, <b><math>\alpha</math>-aminoorcein</b> , <b><math>\beta/\gamma</math>-hydroxyorcein</b> , <b><math>\alpha</math>-hydroxyorcein</b> , <b>indigotin</b> , indirubin | American cochineal + orchil + indigo/woad           |                                                                 |

| Church                                                                                   | Textile number* | Object*                      | Origin and dating*                                | Fiber color | Identified compounds                                                                                                                                                                        | Original dye                                  | Remarks                                               |
|------------------------------------------------------------------------------------------|-----------------|------------------------------|---------------------------------------------------|-------------|---------------------------------------------------------------------------------------------------------------------------------------------------------------------------------------------|-----------------------------------------------|-------------------------------------------------------|
| Basilica of Holy Trinity (Monastery Church of the Dominicans)                            | No. 159         | parura, main textile         | Europe, the 17th cent. <sup>2</sup>               | red         | dcII, <b>carminic acid</b> , carminic acid derivative, dcIV, dcVII, flavokermesic acid, kermesic acid                                                                                       | American cochineal                            | presence of synthetic dye, original fiber color - red |
| Church of St Francis of Assisi (Monastery Church of the Franciscans)                     | No. 161         | chalice velum, outer textile | Europe, the 17th cent. <sup>2</sup>               | red         | dcII, <b>carminic acid</b> , carminic acid derivative, <b>ellagic acid</b> , dcIV, dcVII, kermesic acid                                                                                     | American cochineal                            |                                                       |
| Basilica of Holy Trinity (Monastery Church of the Dominicans)                            | No. 163         | cope, lining                 | Europe, the 17th cent. <sup>2</sup>               | red         | <b>dcII, carminic acid</b> , dcOfka, carminic acid derivative, dcIV, dcVII, flavokermesic acid, kermesic acid                                                                               | American cochineal                            |                                                       |
| Church of the Visitation of the Blessed Virgin Mary (Monastery Church of the Carmelites) | No. 165         | chasuble, textile from sides | N/A, turn of the 17th and 18th cent. <sup>2</sup> | red         | dcII, <b>carminic acid</b> , dcOfka, carminic acid derivative, <b>ellagic acid</b> , dcIV, dcVII, flavokermesic acid                                                                        | American cochineal                            |                                                       |
| Basilica of Holy Trinity (Monastery Church of the Dominicans)                            | No. 171         | burse, main textile          | Europe, the 17th cent. <sup>2</sup>               | blue        | <b>luteolin di-O-hex</b> , <b>luteolin 7-O-glc</b> , <b>apigenin 7-O-glc</b> , luteolin O-hex (2), luteolin, apigenin, diosmetin, isatin, indigoid compound A, <b>indigotin</b> , indirubin | indigo/woad + weld                            |                                                       |
| Church of St Joseph (Monastery Church of the Bernardine Nuns)                            | No. 173         | damask, textile fragment     | Europe, the 17th cent. <sup>2</sup>               | yellow      | laccaic acid C, <b>carminic acid</b> , luteolin di-O-hex, <b>luteolin 7-O-glc</b> , apigenin 7-O-glc, dcVII, <b>laccaic acid B</b> , <b>luteolin</b> , <b>laccaic acid A</b> , bixin        | weld + American cochineal + lac dye + annatto |                                                       |
| Basilica of Holy Trinity (Monastery Church of the Dominicans)                            | No. 174         | chalice velum, lining        | Europe, the 17th cent. <sup>2</sup>               | blue        | isatin, <b><math>\alpha</math>-aminoorcein</b> , <b><math>\alpha</math>-hydroxyorcein</b> , <b>indigotin</b> , indirubin                                                                    | indigo/woad + traces of orchil                |                                                       |
| Church of the Visitation of the Blessed Virgin Mary (Monastery Church of the Carmelites) | No. 177         | stole, textile from ends     | N/A, the 17th cent. <sup>2</sup>                  | red         | digalloylglucose, dcII, <b>carminic acid</b> , dcOfka, carminic acid derivative, <b>ellagic acid</b> , dcIV, dcVII, flavokermesic acid                                                      | American cochineal + ellagotannins            |                                                       |
| Corpus Christi Basilica                                                                  | No. 180         | chasuble, textile from sides | Europe, the 17th cent. <sup>2</sup>               | red         | protosappanin B, caes1, <b>caesD</b> , dcII, <b>carminic acid</b> , genistin, <b>caesC</b> , luteolin 7-O-glc, dcIV, dcVII, flavokermesic acid, kermesic acid                               | American cochineal + brazilwood               | presence of synthetic dye, original                   |

| Church                                                                                    | Textile number* | Object*                         | Origin and dating*                  | Fiber color | Identified compounds                                                                                                                                                                                                                                                                        | Original dye                                                         | Remarks                                           |
|-------------------------------------------------------------------------------------------|-----------------|---------------------------------|-------------------------------------|-------------|---------------------------------------------------------------------------------------------------------------------------------------------------------------------------------------------------------------------------------------------------------------------------------------------|----------------------------------------------------------------------|---------------------------------------------------|
| Church of the Annunciation to the Blessed Virgin Mary (Monastery Church of the Capuchins) | No. 182         | chasuble, textile from sides    | Europe, the 17th cent. <sup>2</sup> | red         | <b>isatin</b> , <b>indigotin</b> , indirubin                                                                                                                                                                                                                                                | American cochineal                                                   | fiber color - red                                 |
| Basilica of Holy Trinity (Monastery Church of the Dominicans)                             | No. 183         | pall, main textile              | Europe, the 17th cent. <sup>2</sup> | blue        | isatin, <b>indigotin</b> , indirubin                                                                                                                                                                                                                                                        | indigo/woad + weld                                                   |                                                   |
| Church of St Peter and St Paul                                                            | No. 184         | stole, main textile             | Europe, the 17th cent. <sup>2</sup> | blue        | luteolin C-hex, <b>carminic acid</b> , <b>genistin</b> , <b>luteolin 7-O-glc</b> , luteolin O-glc, apigenin 7-O-glc, luteolin O-hex (2), O-methyluteolin O-glc, <b>luteolin</b> , <b>genistein</b> , luteolin methyl ether (1), apigenin, biochanin A, isatin, <b>indigotin</b> , indirubin | dyer's broom + indigo/woad + traces of cochineal (of unknown origin) |                                                   |
| Church of the Annunciation to the Blessed Virgin Mary (Monastery Church of the Capuchins) | No. 185         | chasuble, textile from sides    | Europe, the 17th cent. <sup>2</sup> | red         | <b>carminic acid</b> , carminic acid derivative, dcIV, dcVII                                                                                                                                                                                                                                | American cochineal                                                   | traces of synthetic dye                           |
| Church of St Mark                                                                         | No. 187         | chasuble, textile from sides    | Europe, the 17th cent. <sup>2</sup> | purple      | dcII, <b>carminic acid</b> , carminic acid derivative, dcIV, dcVII, flavokermesic acid, isatin, indigoid compound A, <b>indigotin</b>                                                                                                                                                       | American cochineal + indigo/woad                                     |                                                   |
| Church of St Francis of Assisi (Monastery Church of the Franciscans)                      | No. 192         | chasuble, textile from sides    | Europe, the 17th cent. <sup>2</sup> | red         | <b>carminic acid</b> , carminic acid derivative, <b>ellagic acid</b> , dcIV, dcVII, flavokermesic acid, kermesic acid                                                                                                                                                                       | American cochineal                                                   |                                                   |
| Basilica of Holy Trinity (Monastery Church of the Dominicans)                             | No. 193         | parura, main textile            | Europe, the 17th cent. <sup>2</sup> | red         | luteolin di-O-hex, luteolin 7-O-glc, luteolin, apigenin, diosmetin, isatin, <b>indigotin</b>                                                                                                                                                                                                | American cochineal                                                   | traces of synthetic dyes                          |
| Basilica of Holy Trinity (Monastery Church of the Dominicans)                             | No. 196         | stole, textile from the endings | Europe, the 17th cent. <sup>2</sup> | red         | brazilein, protosappanin B, <b>caes1</b> , <b>caesD</b> , <b>uroolithin C</b> , caes2, <b>bixin</b>                                                                                                                                                                                         | brazilwood + annatto                                                 | presence of synthetic dye, original fiber color - |

| Church                                                                                                              | Textile number* | Object*                      | Origin and dating*                  | Fiber color | Identified compounds                                                                                                               | Original dye                                            | Remarks          |
|---------------------------------------------------------------------------------------------------------------------|-----------------|------------------------------|-------------------------------------|-------------|------------------------------------------------------------------------------------------------------------------------------------|---------------------------------------------------------|------------------|
| Church of St Andrew<br>(Monastery Church of the Poor Clares)                                                        | No. 198         | chalice velum, main textile  | Europe, the 17th cent. <sup>2</sup> | red         | brazilein, <b>protosappanin B</b> , caes1, <b>caesD</b> , <b>carminic acid</b> , <b>caesC</b> , caes2, isatin, <b>indigotin</b>    | brazilwood + American cochineal + traces of indigo/woad | yellow or orange |
| Basilica of Holy Trinity<br>(Monastery Church of the Dominicans)                                                    | No. 199         | burse, outer textile         | Europe, the 17th cent. <sup>2</sup> | red         | caesD, dcII, <b>carminic acid</b> , luteolin 7-O-glc, carminic acid derivative, dcIV, dcVII, flavokermesic acid, kermesic acid     | American cochineal                                      |                  |
| Church of the Annunciation to the Blessed Virgin Mary<br>(Monastery Church of the Capuchins)                        | No. 202         | chasuble, textile from sides | Europe, the 17th cent. <sup>2</sup> | red         | digalloylglucose, dcII, <b>carminic acid</b> , carminic acid derivative, ellagic acid, dcIV, dcVII                                 | American cochineal + traces of ellagotannins            |                  |
| Church of St Francis of Assisi<br>(Monastery Church of the Franciscans)                                             | No. 208         | chasuble, textile from sides | Europe, the 17th cent. <sup>2</sup> | yellow      | <b>brazilein</b> , <b>protosappanin B</b> , caes1, <b>caesD</b> , <b>uroolithin C</b> , caes2, <b>sulfuretin</b>                   | brazilwood + young fustic                               |                  |
| Church of St Barbara                                                                                                | No. 208         | chasuble, textile from sides | Europe, the 17th cent. <sup>2</sup> | orange      | brazilein, protosappanin B, caes1, <b>caesD</b> , carminic acid, genistin, <b>caesC</b> , luteolin 7-O-glc, genistein, biochanin A | brazilwood + dyer's broom                               |                  |
| Basilica of Holy Trinity<br>(Monastery Church of the Dominicans)                                                    | No. 209         | stole, main textile          | Europe, the 17th cent. <sup>2</sup> | red         | <b>brazilein</b> , <b>protosappanin B</b> , caes1, <b>caesD</b> , <b>caesC</b> , caes2                                             | brazilwood                                              |                  |
| Church of St Francis of Assisi<br>(Monastery Church of the Franciscans)                                             | No. 210         | chasuble, textile from sides | Europe, the 17th cent. <sup>2</sup> | red         | dcII, <b>carminic acid</b> , dcOfka, carminic acid derivative, ellagic acid, dcIV, dcVII, flavokermesic acid, kermesic acid        | American cochineal                                      |                  |
| Church of St Michael the Archangel and St Stanislaus Bishop and Martyr<br>(Monastery Church of the Pauline Fathers) | No. 211         | chasuble, main textile       | Europe, the 17th cent. <sup>2</sup> | red         | dcII, <b>carminic acid</b> , dcOfka, carminic acid derivative, ellagic acid, dcIV, dcVII, flavokermesic acid                       | American cochineal                                      |                  |

| Church                                                        | Textile number* | Object*                                           | Origin and dating*                  | Fiber color                | Identified compounds                                                                                                                                                                               | Original dye                                              | Remarks                                                |
|---------------------------------------------------------------|-----------------|---------------------------------------------------|-------------------------------------|----------------------------|----------------------------------------------------------------------------------------------------------------------------------------------------------------------------------------------------|-----------------------------------------------------------|--------------------------------------------------------|
| Basilica of Holy Trinity (Monastery Church of the Dominicans) | No. 212         | cope, insert 'a scacchi' under the hood           | Europe, the 17th cent. <sup>2</sup> | red                        | caes1, caesD, dcII, <b>carminic acid</b> , caesC, carminic acid derivative, <b>ellagic acid</b> , dcIV, dcVII, flavokermesic acid, kermesic acid, isatin, indigotin                                | American cochineal + traces of brazilwood and indigo/woad |                                                        |
| Basilica of Holy Trinity (Monastery Church of the Dominicans) | No. 213         | stole, main textile                               | Europe, the 17th cent. <sup>2</sup> | red                        | dcII, <b>carminic acid</b> , dcOfka, carminic acid derivative, ellagic acid, dcIV, dcVII, flavokermesic acid, kermesic acid                                                                        | American cochineal                                        |                                                        |
| Church of St Stephen                                          | No. 218         | chasuble, main textile                            | Europe, the 17th cent. <sup>3</sup> | red                        | dcII, <b>carminic acid</b> , carminic acid derivative, ellagic acid, dcIV, dcVII                                                                                                                   | American cochineal                                        |                                                        |
| Church of St Barbara                                          | No. 219         | chasuble, textile from sides                      | Europe, the 17th cent. <sup>3</sup> | bluish purple              | isatin, $\beta/\gamma$ -aminoorcein, $\beta/\gamma$ -aminoorceinimine, $\beta/\gamma$ -aminoorcein, <b><math>\alpha</math>-aminoorcein</b> , $\alpha$ -hydroxyorcein, <b>indigotin</b> , indirubin | indigo/woad + orchil                                      |                                                        |
| Basilica of Holy Trinity (Monastery Church of the Dominicans) | No. 220         | chasuble, orphrey and around-neck-opening textile | Europe, the 17th cent. <sup>3</sup> | red                        | <b>dcII, carminic acid</b> , dcOfka, carminic acid derivative, ellagic acid, dcIV, dcVII, <b>flavokermesic acid</b> , kermesic acid                                                                | American cochineal                                        | presence of synthetic dyes, original fiber color - red |
| Church of St Joseph (Monastery Church of the Bernardine Nuns) | No. 221         | chasuble, main textile                            | Europe, the 17th cent. <sup>3</sup> | red                        | <b>carminic acid</b> , genistin, luteolin 7-O-glc, dcIV, dcVII, flavokermesic acid, kermesic acid                                                                                                  | American cochineal                                        | presence of synthetic dye, original fiber color - red  |
| Basilica of Holy Trinity (Monastery Church of the Dominicans) | No. 222         | chasuble, front textile                           | Europe, the 17th cent. <sup>3</sup> | red                        | dcII, <b>carminic acid</b> , carminic acid derivative, dcIV, dcVII, flavokermesic acid, kermesic acid                                                                                              | American cochineal                                        | traces of synthetic dyes                               |
| Church of St Anne                                             | No. 227         | chasuble, textile from sides                      | Europe, the 17th cent. <sup>3</sup> | yellow/natural (colorless) | isatin, <b>indigotin</b>                                                                                                                                                                           | traces of indigo/woad, probably undyed, natural fiber     | traces of synthetic dye                                |



| Church                                                                                                           | Textile number* | Object*                        | Origin and dating*                  | Fiber color | Identified compounds                                                                                                                                                                                                                                                                                 | Original dye                          | Remarks                                               |
|------------------------------------------------------------------------------------------------------------------|-----------------|--------------------------------|-------------------------------------|-------------|------------------------------------------------------------------------------------------------------------------------------------------------------------------------------------------------------------------------------------------------------------------------------------------------------|---------------------------------------|-------------------------------------------------------|
| Church of St Peter and St Paul                                                                                   | No. 228         | chalice velum, lining          | Europe, the 17th cent. <sup>3</sup> | red         | <u>carminic acid</u> , carminic acid derivative, ellagic acid, dcIV, dcVII, flavokermesic acid, kermesic acid, isatin, $\beta/\gamma$ -aminoorcein, be, $\beta/\gamma$ -aminoorceinimine, $\beta/\gamma$ -aminoorcein, $\alpha$ -aminoorcein, $\beta/\gamma$ -hydroxyorcein, $\alpha$ -hydroxyorcein | American cochineal + traces of orchil |                                                       |
| Church of St Francis of Assisi (Monastery Church of the Franciscans)                                             | No. 234         | chasuble, textile from orphrey | Europe, the 17th cent. <sup>3</sup> | red         | dcII, <u>carminic acid</u> , genistein O-hex, luteolin 7-O-glc, carminic acid derivative, dcIV, dcVII, flavokermesic acid, kermesic acid                                                                                                                                                             | American cochineal                    |                                                       |
| Church of St Francis of Assisi (Monastery Church of the Franciscans)                                             | No. 234         | stole, outer textile           | Europe, the 17th cent. <sup>3</sup> | red         | dcII, <u>carminic acid</u> , genistin, carminic acid derivative, dcIV, dcVII, flavokermesic acid, kermesic acid                                                                                                                                                                                      | American cochineal                    |                                                       |
| Church of St Francis of Assisi (Monastery Church of the Franciscans)                                             | No. 234         | chalice velum, main textile    | Europe, the 17th cent. <sup>3</sup> | red         | dcII, <u>carminic acid</u> , <b>carminic acid derivative</b> , dcIV, dcVII, flavokermesic acid, kermesic acid                                                                                                                                                                                        | American cochineal                    | presence of synthetic dye, original fiber color - red |
| Church of St Andrew (Monastery Church of the Poor Clares)                                                        | No. 234 (17)    | dalmatic, lining               | Europe, the 17th cent. <sup>3</sup> | red         | <u>carminic acid</u> , carminic acid derivative, dcIV, dcVII                                                                                                                                                                                                                                         | American cochineal                    | presence of synthetic dye, original fiber color - red |
| Church of St Michael the Archangel and St Stanislaus Bishop and Martyr (Monastery Church of the Pauline Fathers) | No. 235         | cope, main textile             | Europe, the 17th cent. <sup>3</sup> | red         | dcII, <u>carminic acid</u> , carminic acid derivative, dcIV, dcVII                                                                                                                                                                                                                                   | American cochineal                    |                                                       |
| Basilica of Holy Trinity (Monastery Church of the Dominicans)                                                    | No. 236         | cope, textile from mantle      | Europe, the 17th cent. <sup>3</sup> | red         | dcII, <u>carminic acid</u> , dcOfka, carminic acid derivative, dcIV, dcVII, flavokermesic acid, kermesic acid                                                                                                                                                                                        | American cochineal                    |                                                       |
| Basilica of Holy Trinity (Monastery Church of the Dominicans)                                                    | No. 237         | cope, textile from mantle      | Europe, the 17th cent. <sup>3</sup> | red         | caesD, dcII, <u>carminic acid</u> , dcOfka, carminic acid derivative, ellagic acid, dcIV, dcVII, flavokermesic acid, kermesic acid                                                                                                                                                                   | American cochineal                    |                                                       |

| Church                                                                                   | Textile number* | Object*                                                 | Origin and dating*                  | Fiber color | Identified compounds                                                                                                                                                                                                                | Original dye                               | Remarks                 |
|------------------------------------------------------------------------------------------|-----------------|---------------------------------------------------------|-------------------------------------|-------------|-------------------------------------------------------------------------------------------------------------------------------------------------------------------------------------------------------------------------------------|--------------------------------------------|-------------------------|
| Basilica of Holy Trinity (Monastery Church of the Dominicans)                            | No. 237         | cope, textile from orphrey and hood                     | Europe, the 17th cent. <sup>3</sup> | red         | dcII, <b>carminic acid</b> , carminic acid derivative, dcIV, dcVII, flavokermesic acid, kermesic acid                                                                                                                               | American cochineal                         |                         |
| Church of St Andrew (Monastery Church of the Poor Clares)                                | No. 238         | chasuble, orphrey and around-neck-opening textile       | Europe, the 17th cent. <sup>3</sup> | red         | dcII, <b>carminic acid</b> , carminic acid derivative, dcIV, dcVII                                                                                                                                                                  | American cochineal                         |                         |
| Church of St Andrew (Monastery Church of the Poor Clares)                                | No. 238         | chasuble, textile from sides                            | Europe, the 17th cent. <sup>3</sup> | red         | digalloylglucose, trigalloylglucose, tetragalloylglucose (1), dcII, <b>carminic acid</b> , carminic acid derivative, <b>ellagic acid</b> , dcIV, dcVII                                                                              | American cochineal + ellagotannins         |                         |
| Corpus Christi Basilica                                                                  | No. 240         | chasuble, front orphrey and around-neck-opening textile | Europe, the 17th cent. <sup>3</sup> | red         | dcII, <b>carminic acid</b> , <b>genistin</b> , <b>luteolin 7-O-glc</b> , carminic acid derivative, ellagic acid, dcIV, dcVII, <b>luteolin</b> , genistin, luteolin methyl ether (1), flavokermesic acid, kermesic acid, biochanin A | American cochineal + dyer's broom          |                         |
| Church of the Divine Mercy                                                               | No. 242         | maniple, main textile                                   | Europe, the 17th cent. <sup>3</sup> | red         | dcII, <b>carminic acid</b> , dcOfka, carminic acid derivative, <b>ellagic acid</b> , dcIV, dcVII, flavokermesic acid, kermesic acid, isatin, indigotin                                                                              | American cochineal + traces of indigo/woad |                         |
| Church of St Francis of Assisi (Monastery Church of the Franciscans)                     | No. 244         | chasuble, orphrey and around-neck-opening textile       | Europe, the 17th cent. <sup>3</sup> | red         | dcII, <b>carminic acid</b> , luteolin 7-O-glc, dcOfka, carminic acid derivative, ellagic acid, dcIV, dcVII, flavokermesic acid, kermesic acid, isatin, indigotin                                                                    | American cochineal + traces of indigo/woad | traces of synthetic dye |
| Church of St Andrew (Monastery Church of the Poor Clares)                                | No. 245         | chasuble, main textile                                  | Europe, the 17th cent. <sup>3</sup> | red         | digalloylglucose, trigalloylglucose, tetragalloylglucose (1), dcII, <b>carminic acid</b> , dcOfka, carminic acid derivative, ellagic acid, dcIV, dcVII, flavokermesic acid                                                          | American cochineal + ellagotannins         |                         |
| Church of the Visitation of the Blessed Virgin Mary (Monastery Church of the Carmelites) | No. 246         | chasuble and stole, main textile                        | N/A, the 17th cent. <sup>3</sup>    | red         | dcII, <b>carminic acid</b> , carminic acid derivative, ellagic acid, dcIV, dcVII                                                                                                                                                    | American cochineal                         |                         |
| Basilica of Holy Trinity (Monastery Church of the Dominicans)                            | No. 247         | chasuble, main textile                                  | Europe, the 17th cent. <sup>3</sup> | blue        | isatin, <b>indigotin</b>                                                                                                                                                                                                            | indigo/woad                                |                         |

| Church                                                                                              | Textile number* | Object*                                           | Origin and dating*                  | Fiber color | Identified compounds                                                                                                                                                                                                                                                                                         | Original dye                                                                       | Remarks                                    |
|-----------------------------------------------------------------------------------------------------|-----------------|---------------------------------------------------|-------------------------------------|-------------|--------------------------------------------------------------------------------------------------------------------------------------------------------------------------------------------------------------------------------------------------------------------------------------------------------------|------------------------------------------------------------------------------------|--------------------------------------------|
| Church of St Mark                                                                                   | No. 249         | chasuble, main textile                            | Europe, the 17th cent. <sup>3</sup> | red         | <b>brazilein</b> , protosappanin B, <b>caes1</b> , <b>caesD</b> , <b>caesC</b> , <b>caes2</b> , <b>bixin</b>                                                                                                                                                                                                 | brazilwood + annatto                                                               |                                            |
| Basilica of Holy Trinity (Monastery Church of the Dominicans)                                       | No. 251         | parura, main textile                              | Europe, the 17th cent. <sup>3</sup> | blue        | isatin, <b>indigotin</b>                                                                                                                                                                                                                                                                                     | indigo/woad                                                                        |                                            |
| Church of St Mark                                                                                   | No. 252         | dalmatic, main textile                            | Europe, the 17th cent. <sup>3</sup> | blue        | rubiadin <i>O</i> -prmv, xanthopurpurin, isatin, indigoid compound A, indigoid compound A 2, <b>indigotin</b> , <b>indirubin</b>                                                                                                                                                                             | indigo/woad + traces of <i>Rubiaceae</i> dye plant (probably wild madder)          |                                            |
| Church of St Francis of Assisi (Monastery Church of the Franciscans)                                | No. 256         | maniple, main textile                             | Europe, the 17th cent. <sup>3</sup> | yellow      | brazilein, protosappanin B, <b>caes1</b> , <b>caesD</b> , <b>caesC</b> , <b>caes2</b>                                                                                                                                                                                                                        | brazilwood                                                                         |                                            |
| Church of St Mark                                                                                   | No. 257         | cope, textile from mantel                         | Europe, the 17th cent. <sup>3</sup> | blue        | rubiadin <i>O</i> -prmv, xanthopurpurin, isatin, indigoid compound A, $\beta/\gamma$ -aminoorcein, indigoid compound B, $\beta/\gamma$ -aminoorceinimine, $\beta/\gamma$ -aminoorcein, <b><math>\alpha</math>-aminoorcein</b> , $\alpha$ -hydroxyorcein, <b>indigotin</b> , <b>indirubin</b>                 | indigo/woad + orchil + traces of <i>Rubiaceae</i> dye plant (probably wild madder) |                                            |
| Church of the Assumption of the Blessed Virgin Mary (Monastery Church of the Camaldolese Monks)     | No. 259         | chasuble, main textile                            | N/A, the 17th cent. <sup>3</sup>    | blue        | isatin, $\beta/\gamma$ -aminoorcein, $\beta/\gamma$ -aminoorceinimine, $\beta/\gamma$ -aminoorcein, <b><math>\alpha</math>-aminoorcein</b> , $\beta/\gamma$ -hydroxyorcein, <b><math>\alpha</math>-hydroxyorcein</b> , <b>indigotin</b> , indirubin                                                          | indigo/woad + orchil                                                               |                                            |
| Church of the Assumption of the Holy Mother and St Venceslaus (Monastery Church of the Cistercians) | No. 264         | chasuble, textile from front sides                | Europe, the 17th cent. <sup>3</sup> | blue        | isatin, <b><math>\alpha</math>-aminoorcein</b> , $\alpha$ -hydroxyorcein, <b>indigotin</b>                                                                                                                                                                                                                   | indigo/woad + orchil                                                               |                                            |
| Basilica of Holy Trinity (Monastery Church of the Dominicans)                                       | No. 265         | chasuble, orphrey and around-neck-opening textile | Europe, the 17th cent. <sup>3</sup> | purple      | carminic acid, <b>xanthopurpurin</b> , <b>rubiadin</b> , isatin, $\beta/\gamma$ -aminoorcein, $\beta/\gamma$ -aminoorceinimine, $\beta/\gamma$ -aminoorcein, <b><math>\alpha</math>-aminoorcein</b> , $\beta/\gamma$ -hydroxyorcein, <b><math>\alpha</math>-hydroxyorcein</b> , <b>indigotin</b> , indirubin | wild madder + orchil + indigo/woad + traces of cochineal                           | presence of synthetic dyes, original fiber |

| Church                                                                                              | Textile number* | Object*                               | Origin and dating*                  | Fiber color | Identified compounds                                                                                                                                                                                                                                                                                                                                             | Original dye                                                                     | Remarks                                                         |
|-----------------------------------------------------------------------------------------------------|-----------------|---------------------------------------|-------------------------------------|-------------|------------------------------------------------------------------------------------------------------------------------------------------------------------------------------------------------------------------------------------------------------------------------------------------------------------------------------------------------------------------|----------------------------------------------------------------------------------|-----------------------------------------------------------------|
|                                                                                                     |                 |                                       |                                     |             |                                                                                                                                                                                                                                                                                                                                                                  | (probably American one)                                                          | color - red or purple                                           |
| Basilica of Holy Trinity (Monastery Church of the Dominicans)                                       | No. 266         | chasuble, main textile                | Europe, the 17th cent. <sup>3</sup> | blue        | isatin, $\beta/\gamma$ -aminoorcein, $\alpha$ -aminoorcein, $\beta/\gamma$ -hydroxyorcein, <b><math>\alpha</math>-hydroxyorcein</b> , <b><u>indigotin</u></b> , indirubin                                                                                                                                                                                        | indigo/woad + orchil                                                             |                                                                 |
| Basilica of Holy Trinity (Monastery Church of the Dominicans)                                       | No. 266         | parura, main textile                  | Europe, the 17th cent. <sup>3</sup> | blue        | genistin, luteolin 7-O-glc, genistein O-hex, apigenin 7-O-glc, luteolin, genistin, isatin, <b><u>indigotin</u></b>                                                                                                                                                                                                                                               | indigo/woad + traces of dyer's broom                                             | traces of synthetic dyes                                        |
| Church of the Assumption of the Holy Mother and St Venceslaus (Monastery Church of the Cistercians) | No. 267         | chasuble, around-neck-opening textile | Europe, the 17th cent. <sup>3</sup> | blue        | isatin, <b><math>\alpha</math>-aminoorcein</b> , $\alpha$ -hydroxyorcein, <b><u>indigotin</u></b>                                                                                                                                                                                                                                                                | indigo/woad + orchil                                                             |                                                                 |
| Basilica of Holy Trinity (Monastery Church of the Dominicans)                                       | No. 270         | parura, main textile                  | Europe, the 17th cent. <sup>3</sup> | red         | brazilein, <b>protosappanin B</b> , <b>caes1</b> , <b><u>caesD</u></b> , <b><u>caesC</u></b> , <b>caes2</b>                                                                                                                                                                                                                                                      | brazilwood                                                                       | presence of synthetic dye, original fiber color - red or orange |
| Church of St Anne                                                                                   | No. 271         | maniple, main textile                 | France, the 17th cent. <sup>3</sup> | orange      | brazilein, protosappanin B, caes1, <b><u>caesD</u></b> , <b><u>caesC</u></b> , <b>caes2</b> , <b><u>bixin</u></b>                                                                                                                                                                                                                                                | brazilwood + annatto                                                             |                                                                 |
| Basilica of Holy Trinity (Monastery Church of the Dominicans)                                       | No. 274         | stole, main textile                   | Europe, the 17th cent. <sup>3</sup> | blue        | isatin, <b><u>indigotin</u></b>                                                                                                                                                                                                                                                                                                                                  | indigo/woad                                                                      |                                                                 |
| Church of St Francis of Assisi (Monastery Church of the Franciscans)                                | No. 275         | dalmatic, main textile                | Europe, the 17th cent. <sup>3</sup> | blue        | carminic acid, rubiadin O-prmv, <b>xanthopurpurin</b> , <b><u>rubiadin</u></b> , isatin, indigoid compound A, $\beta/\gamma$ -aminoorcein, $\beta/\gamma$ -aminoorceinimine, $\beta/\gamma$ -aminoorcein, <b><math>\alpha</math>-aminoorcein</b> , $\beta/\gamma$ -hydroxyorcein, <b><math>\alpha</math>-hydroxyorcein</b> , <b><u>indigotin</u></b> , indirubin | indigo/woad + orchil + wild madder + traces of cochineal (probably American one) |                                                                 |

| Church                                                                                              | Textile number* | Object*                                       | Origin and dating*                                    | Fiber color | Identified compounds                                                                                                                                                                                                                                                                                                                                       | Original dye                       | Remarks                                                          |
|-----------------------------------------------------------------------------------------------------|-----------------|-----------------------------------------------|-------------------------------------------------------|-------------|------------------------------------------------------------------------------------------------------------------------------------------------------------------------------------------------------------------------------------------------------------------------------------------------------------------------------------------------------------|------------------------------------|------------------------------------------------------------------|
| Basilica of Holy Trinity (Monastery Church of the Dominicans)                                       | No. 278         | chasuble, textile from sides                  | Europe, the 17th cent. <sup>3</sup>                   | purple      | rubiadin <i>O</i> -prmv, <b>xanthopurpurin</b> , <b>rubiadin</b> , isatin, $\beta/\gamma$ -aminoorcein, <b><math>\beta/\gamma</math>-aminoorceinimine</b> , <b><math>\beta/\gamma</math>-aminoorcein</b> , <b><math>\alpha</math>-aminoorcein</b> , $\beta/\gamma$ -hydroxyorcein, <b><math>\alpha</math>-hydroxyorcein</b> , <b>indigotin</b> , indirubin | wild madder + orchil + indigo/woad | presence of synthetic dyes, original fiber color - red or purple |
| Church of St Adalbert                                                                               | No. 281         | chasuble, textile from orphrey                | France, the 17th cent. <sup>3</sup>                   | blue        | isatin, <b>indigotin</b>                                                                                                                                                                                                                                                                                                                                   | indigo/woad                        | traces of synthetic dyes                                         |
| Basilica of Holy Trinity (Monastery Church of the Dominicans)                                       | No. 282         | dalmatic, main textile                        | Europe, the 17th cent. <sup>3</sup>                   | blue        | rubiadin <i>O</i> -prmv, <b>xanthopurpurin</b> , <b>rubiadin</b> , isatin, $\beta/\gamma$ -aminoorcein, <b><math>\beta/\gamma</math>-aminoorceinimine</b> , <b><math>\beta/\gamma</math>-aminoorcein</b> , <b><math>\alpha</math>-aminoorcein</b> , $\beta/\gamma$ -hydroxyorcein, <b><math>\alpha</math>-hydroxyorcein</b> , <b>indigotin</b> , indirubin | indigo/woad + wild madder + orchil |                                                                  |
| Church of St Andrew (Monastery Church of the Poor Clares)                                           | No. 283         | dalmatic, outer textile                       | Europe, the 17th cent. <sup>3</sup>                   | blue        | isatin, <b>indigotin</b>                                                                                                                                                                                                                                                                                                                                   | indigo/woad                        |                                                                  |
| Church of the Assumption of the Holy Mother and St Venceslaus (Monastery Church of the Cistercians) | No. 284         | chasuble, textile from back and front orphrey | France, the 17 <sup>th</sup> -18th cent. <sup>3</sup> | blue        | isatin, <b><math>\alpha</math>-aminoorcein</b> , $\alpha$ -hydroxyorcein, <b>indigotin</b>                                                                                                                                                                                                                                                                 | indigo/woad + orchil               |                                                                  |
| Basilica of Holy Trinity (Monastery Church of the Dominicans)                                       | No. 286         | chasuble, main textile                        | Europe, the 17th cent. <sup>3</sup>                   | red         | dcII, <b>carminic acid</b> , carminic acid derivative, dcIV, dcVII, flavokermesic acid, kermesic acid                                                                                                                                                                                                                                                      | American cochineal                 | presence of synthetic dye, original fiber color - red            |
| Basilica of Holy Trinity (Monastery Church of the Dominicans)                                       | No. 289         | chasuble, main textile                        | Europe, the 17th cent. <sup>3</sup>                   | red         | dcII, <b>carminic acid</b> , carminic acid derivative, ellagic acid, dcIV, dcVII                                                                                                                                                                                                                                                                           | American cochineal                 |                                                                  |
| Church of the Conversion of St Paul (Monastery Church of the Lazarists)                             | No. 290         | cope, textile from orphrey and hood           | France, the 17th cent. <sup>3</sup>                   | red         | laccaic acid E, <b>laccaic acid C</b> , xantholaccaic acid B, <b>laccaic acid B</b> , <b>laccaic acid A</b> , flavokermesic acid                                                                                                                                                                                                                           | lac dye                            | presence of synthetic dye, original                              |

| Church                                                                                          | Textile number* | Object*                     | Origin and dating*                     | Fiber color | Identified compounds                                                                                                                                                                                                                                               | Original dye                                                        | Remarks                                                |
|-------------------------------------------------------------------------------------------------|-----------------|-----------------------------|----------------------------------------|-------------|--------------------------------------------------------------------------------------------------------------------------------------------------------------------------------------------------------------------------------------------------------------------|---------------------------------------------------------------------|--------------------------------------------------------|
|                                                                                                 |                 |                             |                                        |             |                                                                                                                                                                                                                                                                    |                                                                     | fiber color - red                                      |
| Church of the Conversion of St Paul (Monastery Church of the Lazarists)                         | No. 294         | chasuble, main textile      | Germany, the 17th cent. <sup>3</sup>   | purple      | dcII, <b>carminic acid</b> , genistein <i>O</i> -hex, carminic acid derivative, dcIV, dcVII, genistein, flavokermesic acid, kermesic acid                                                                                                                          | American cochineal                                                  | presence of synthetic dyes, original fiber color - red |
| Corpus Christi Basilica                                                                         | No. 295         | cope, main textile          | Europe, the 16th cent. <sup>3</sup>    | red         | <b>digalloylglucose</b> , <b>trigalloylglucose</b> , <b>tetragalloylglucose (1)</b> , tetragalloylglucose (2), <b>dcII</b> , <b>carminic acid</b> , dcOfka, carminic acid derivative, <b>ellagic acid</b> , dcIV, dcVII, <b>flavokermesic acid</b> , kermesic acid | American cochineal + ellagotannins                                  |                                                        |
| Church of St Francis of Assisi (Monastery Church of the Franciscans)                            | No. 296         | chalice velum, main textile | Europe, the 17th cent. <sup>3</sup>    | red         | <b>carminic acid</b> , genistin, luteolin 7- <i>O</i> -glc, carminic acid derivative, ellagic acid, dcIV, dcVII, kermesic acid, isatin, indigotin                                                                                                                  | cochineal (of unknown origin) + traces of dyer's broom, indigo/woad | traces of synthetic dyes                               |
| Church of St Peter and St Paul                                                                  | No. 296         | chalice velum, main textile | Europe, the 17th cent. <sup>3</sup>    | red         | <b>brazilein</b> , <b>protosappanin B</b> , caes1, <b>caesD</b> , <b>carminic acid</b> , <b>caesC</b> , caes2, isatin, indigotin, <b>bixin</b>                                                                                                                     | brazilwood + cochineal (of unknown origin) + annatto                |                                                        |
| Church of the Annunciation to the Blessed Virgin Mary (Monastery Church of the Capuchins)       | No. 297         | chasuble, orphrey textile   | N/A, the 17th-18th cent. <sup>3</sup>  | blue        | isatin, <b>indigotin</b> , indirubin                                                                                                                                                                                                                               | indigo/woad                                                         |                                                        |
| Church of the Assumption of the Blessed Virgin Mary (Monastery Church of the Camaldolese Monks) | No. 301         | chasuble, main textile      | Near East, the 16th cent. <sup>4</sup> | red         | dcII, <b>carminic acid</b> , carminic acid derivative, ellagic acid, dcIV, dcVII, flavokermesic acid, kermesic acid, isatin, <b>indigotin</b>                                                                                                                      | American cochineal + traces of indigo/woad                          |                                                        |

| Church                                                                                   | Textile number* | Object*                             | Origin and dating*                          | Fiber color | Identified compounds                                                                                                                       | Original dye                              | Remarks                                                |
|------------------------------------------------------------------------------------------|-----------------|-------------------------------------|---------------------------------------------|-------------|--------------------------------------------------------------------------------------------------------------------------------------------|-------------------------------------------|--------------------------------------------------------|
| Basilica of Holy Trinity (Monastery Church of the Dominicans)                            | No. 302         | chasuble, textile from sides        | Near East, the 16th cent. <sup>4</sup>      | red         | dcII, <b>carminic acid</b> , dcOfka, carminic acid derivative, dcIV, dcVII, flavokermesic acid, kermesic acid                              | American cochineal                        |                                                        |
| Church of St Stephen                                                                     | No. 303         | chasuble, textile from sides        | Near East, the 17th cent. <sup>4</sup>      | red         | dcII, <b>carminic acid</b> , carminic acid derivative, ellagic acid, dcIV, dcVII, flavokermesic acid, kermesic acid                        | American cochineal                        |                                                        |
| Church of St Stephen                                                                     | No. 303         | chasuble, textile from sides        | Near East, the 17th cent. <sup>4</sup>      | red         | dcII, <b>carminic acid</b> , carminic acid derivative, ellagic acid, dcIV, dcVII, flavokermesic acid, kermesic acid                        | American cochineal                        |                                                        |
| Corpus Christi Basilica                                                                  | No. 304         | chasuble, textile from sides        | Near East, the 17th cent. <sup>4</sup>      | red         | dcII, <b>carminic acid</b> , dcOfka, carminic acid derivative, ellagic acid, dcIV, dcVII, flavokermesic acid, kermesic acid                | American cochineal                        | traces of synthetic dyes                               |
| Corpus Christi Basilica                                                                  | No. 305         | chasuble, main textile              | Near East, the 17th cent. <sup>4</sup>      | red/purple  | <b>laccic acid C</b> , carminic acid, xantholaccaic acid B, <b>laccic acid B</b> , <b>laccic acid A</b> , flavokermesic acid               | lac dye                                   |                                                        |
| Church of St Peter and St Paul                                                           | No. 306         | chasuble, main textile              | Near East, the 17th cent. <sup>4</sup>      | red         | dcII, <b>carminic acid</b> , dcOfka, carminic acid derivative, ellagic acid, dcIV, dcVII, flavokermesic acid, kermesic acid                | American cochineal                        | presence of synthetic dyes, original fiber color - red |
| Church of the Visitation of the Blessed Virgin Mary (Monastery Church of the Carmelites) | No. 307         | cope, textile from mantle           | Near East, the 17th cent. <sup>4</sup>      | red/purple  | dcII, <b>carminic acid</b> , carminic acid derivative, dcIV, dcVII                                                                         | American cochineal                        |                                                        |
| Corpus Christi Basilica                                                                  | No. 308         | chasuble, textile from sides        | Near East, the 17th cent. <sup>4</sup>      | purple      | laccic acid C, carminic acid, xantholaccaic acid B, <b>laccic acid B</b> , <b>laccic acid A</b> , flavokermesic acid                       | lac dye                                   | presence of synthetic dyes, original fiber color - red |
| Church of St Catherine of Alexandria                                                     | No. 309         | cope, textile from orphrey and hood | Near East, the 17th cent. <sup>4</sup>      | red         | caesD, dcII, <b>carminic acid</b> , caesC, dcOfka, carminic acid derivative, ellagic acid, dcIV, dcVII, flavokermesic acid, kermesic acid, | American cochineal + traces of brazilwood |                                                        |
| Church of St Francis of Assisi (Monastery Church of the Franciscans)                     | No. 310         | chasuble, textile from orphrey      | Near East, the 16th-17th cent. <sup>4</sup> | red         | dcII, <b>carminic acid</b> , dcOfka, carminic acid derivative, dcIV, dcVII, flavokermesic acid, kermesic acid                              | American cochineal                        |                                                        |

| Church                                                                                          | Textile number* | Object*                               | Origin and dating*                     | Fiber color     | Identified compounds                                                                                                                                                                        | Original dye                     | Remarks                  |
|-------------------------------------------------------------------------------------------------|-----------------|---------------------------------------|----------------------------------------|-----------------|---------------------------------------------------------------------------------------------------------------------------------------------------------------------------------------------|----------------------------------|--------------------------|
| Church of St Francis of Assisi (Monastery Church of the Franciscans)                            | No. 311         | chasuble, main textile                | Near East, the 17th cent. <sup>4</sup> | blue            | dcII, <b>carminic acid</b> , carminic acid derivative, dcIV, dcVII, flavokermesic acid, kermesic acid, isatin, indigoid compound A, <b>indigotin</b> , indirubin                            | indigo/woad + American cochineal |                          |
| Church of St Andrew (Monastery Church of the Poor Clares)                                       | No. 312         | chasuble, main textile                | Near East, the 17th cent. <sup>4</sup> | red             | brazilein, protosappanin B, caesI, caesD, caesC, lucidin O-prmv, ruberythric acid, rubiadin O-prmv, anthragallol, <b>alizarin</b> , <b>purpurin</b> , <b>nordamnacanthal</b>                | madder + traces of brazilwood    |                          |
| Church of St Andrew (Monastery Church of the Poor Clares)                                       | No. 312         | chasuble, main textile                | Near East, the 17th cent. <sup>4</sup> | red             | brazilein, protosappanin B, caesI, caesD, carminic acid, caesC, lucidin O-prmv, ruberythric acid, rubiadin O-prmv, anthragallol, <b>alizarin</b> , <b>purpurin</b> , <b>nordamnacanthal</b> | madder + traces of brazilwood    |                          |
| Church of St Andrew (Monastery Church of the Poor Clares)                                       | No. 313         | chasuble, main textile                | Near East, the 17th cent. <sup>4</sup> | blue            | isatin, indigoid compound A, <b>indigotin</b> , indirubin                                                                                                                                   | indigo/woad                      |                          |
| Corpus Christi Basilica                                                                         | No. 315         | chasuble, around-neck-opening textile | Near East, the 17th cent. <sup>4</sup> | red             | laccaic acid C, xantholaccaic acid B, <b>laccaic acid B</b> , <b>laccaic acid A</b> , flavokermesic acid                                                                                    | lac dye                          |                          |
| Corpus Christi Basilica                                                                         | No. 316         | chasuble, textile from orphrey        | Near East, the 17th cent. <sup>4</sup> | red             | laccaic acid C, xantholaccaic acid B, <b>laccaic acid B</b> , <b>laccaic acid A</b> , flavokermesic acid                                                                                    | lac dye                          | traces of synthetic dyes |
| Church of the Assumption of the Blessed Virgin Mary (Monastery Church of the Camaldolese Monks) | No. 318         | chasuble, main textile                | Near East, the 17th cent. <sup>4</sup> | blue            | isatin, <b>indigotin</b> , indirubin                                                                                                                                                        | indigo/woad                      |                          |
| Church of the Assumption of the Blessed Virgin Mary (Monastery Church of the Camaldolese Monks) | No. 319         | chasuble, textile from sides          | Near East, the 17th cent. <sup>4</sup> | blue            | isatin, <b>indigotin</b> , indirubin                                                                                                                                                        | indigo/woad                      |                          |
| Church of St Anne                                                                               | No. 322         | burse, outer textile                  | Near East, the 17th cent. <sup>4</sup> | red             | <b>dcII</b> , <b>carminic acid</b> , dcOfka, carminic acid derivative, ellagic acid, dcIV, dcVII, flavokermesic acid, kermesic acid                                                         | American cochineal               |                          |
| Church of the Annunciation to the Blessed Virgin Mary                                           | No. 331         | burse, outer textile                  | Near East, the 17th cent. <sup>4</sup> | greenish yellow | <b>isatin</b> , <b>indigotin</b>                                                                                                                                                            | indigo/woad                      |                          |



| Church                                                                                    | Textile number*          | Object*                      | Origin and dating*                     | Fiber color | Identified compounds                                                                                                                                                  | Original dye                       | Remarks                                                         |
|-------------------------------------------------------------------------------------------|--------------------------|------------------------------|----------------------------------------|-------------|-----------------------------------------------------------------------------------------------------------------------------------------------------------------------|------------------------------------|-----------------------------------------------------------------|
| (Monastery Church of the Capuchins)                                                       |                          |                              |                                        |             |                                                                                                                                                                       |                                    |                                                                 |
| Church of the Annunciation to the Blessed Virgin Mary (Monastery Church of the Capuchins) | No. 333                  | chalice velum, outer textile | Near East, the 17th cent. <sup>4</sup> | orange      | brazilein, protosappanin B, caes1, <u>caesD</u> , <u>caesC</u> , caes2, isatin, indigotin                                                                             | brazilwood                         | traces of synthetic dye                                         |
| Church of St Mark                                                                         | No. 335                  | burse, main textile          | Near East, the 17th cent. <sup>4</sup> | red         | brazilein, protosappanin B, caes1, <u>caesD</u> , <u>caesC</u> , caes2                                                                                                | brazilwood                         |                                                                 |
| Basilica of Holy Trinity (Monastery Church of the Dominicans)                             | No. 339                  | chalice velum, main textile  | Near East, the 17th cent. <sup>4</sup> | red         | dcII, <u>carminic acid</u> , carminic acid derivative, dcIV, dcVII, flavokermesic acid, kermesic acid                                                                 | American cochineal                 |                                                                 |
| Basilica of Holy Trinity (Monastery Church of the Dominicans)                             | N/A (D-9 <sup>#</sup> )  | chasuble, textile from sides | Europe, the 16th cent.                 | red         | dcII, <u>carminic acid</u> , dcOfka, carminic acid derivative, ellagic acid, dcIV, dcVII, flavokermesic acid, kermesic acid                                           | American cochineal                 |                                                                 |
| Basilica of Holy Trinity (Monastery Church of the Dominicans)                             | N/A (D-29 <sup>#</sup> ) | parura, main textile         | Europe, the 17th cent.                 | red         | luteolin di- <i>O</i> -hex, luteolin 7- <i>O</i> -glc, apigenin 7- <i>O</i> -glc, luteolin <i>O</i> -hex (2), luteolin, apigenin, diosmetin, isatin, <u>indigotin</u> | indigo/woad + traces of weld       | presence of synthetic dye, original fiber color - blue          |
| Basilica of Holy Trinity (Monastery Church of the Dominicans)                             | N/A (D-39 <sup>#</sup> ) | parura, main textile         | Europe, the 17th cent.                 | purple      | <u>carminic acid</u> , luteolin 7- <i>O</i> -glc, ellagic acid, luteolin                                                                                              | American cochineal + ellagotannins | presence of synthetic dye, original fiber color - red           |
| Basilica of Holy Trinity (Monastery Church of the Dominicans)                             | N/A (D-50 <sup>#</sup> ) | pelmet, main textile         | Europe, the 17th cent.                 | red         | brazilein, <u>protosappanin B</u> , caes1, <u>caesD</u> , <u>caesC</u> , caes2                                                                                        | brazilwood                         | presence of synthetic dye, original fiber color - red or orange |
| Church of St Francis of Assisi (Monastery Church of the Franciscans)                      | N/A (F-9 <sup>#</sup> )  | chasuble, main textile       | Near East, the 16th cent.              | red         | dcII, <u>carminic acid</u> , carminic acid derivative, ellagic acid, dcIV, dcVII, flavokermesic acid, kermesic acid                                                   | American cochineal                 |                                                                 |

| Church                                                                                   | Textile number*             | Object*                                                 | Origin and dating*     | Fiber color | Identified compounds                                                                                                                  | Original dye         | Remarks                                               |
|------------------------------------------------------------------------------------------|-----------------------------|---------------------------------------------------------|------------------------|-------------|---------------------------------------------------------------------------------------------------------------------------------------|----------------------|-------------------------------------------------------|
| Church of St Francis of Assisi (Monastery Church of the Franciscans)                     | N/A (F-11/3 <sup>#</sup> )  | chasuble, around-neck-opening textile                   | N/A                    | yellow      | <b>brazilein</b> , protosappanin B, <b>caes1</b> , <b>caesD</b> , <b>urolithin C</b> , <b>caes2</b> , isatin, indigotin, <b>bixin</b> | brazilwood + annatto |                                                       |
| Church of St Francis of Assisi (Monastery Church of the Franciscans)                     | N/A (F-22 <sup>#</sup> )    | chasuble, orphreys and around-neck-opening textile      | Europe, the 17th cent. | red         | <b>brazilein</b> , protosappanin B, <b>caes1</b> , <b>caesD</b> , <b>caesC</b> , <b>caes2</b>                                         | brazilwood           |                                                       |
| Church of St Andrew (Monastery Church of the Poor Clares)                                | N/A (Kla-2/2 <sup>#</sup> ) | chasuble, lining                                        | Europe, the 17th cent. | red         | <b>carminic acid</b> , carminic acid derivative, dcIV, dcVII                                                                          | American cochineal   | presence of synthetic dye, original fiber color - red |
| Church of the Visitation of the Blessed Virgin Mary (Monastery Church of the Carmelites) | N/A (KnP-2/2 <sup>#</sup> ) | chasuble, textile from middle insert in front left side | N/A                    | red         | dcII, <b>carminic acid</b> , carminic acid derivative, dcIV, dcVII                                                                    | American cochineal   |                                                       |
| Church of the Visitation of the Blessed Virgin Mary (Monastery Church of the Carmelites) | N/A (KnP-2/3 <sup>#</sup> ) | chasuble, textile from bottom insert in front left side | N/A                    | red         | dcII, <b>carminic acid</b> , carminic acid derivative, dcIV, dcVII                                                                    | American cochineal   |                                                       |
| Church of the Visitation of the Blessed Virgin Mary (Monastery Church of the Carmelites) | N/A (KnP-2/4 <sup>#</sup> ) | chasuble, textile from upper insert in front left side  | N/A                    | red         | dcII, <b>carminic acid</b> , carminic acid derivative, ellagic acid, dcIV, dcVII                                                      | American cochineal   |                                                       |
| Church of the Visitation of the Blessed Virgin Mary (Monastery Church of the Carmelites) | N/A (KnP-7 <sup>#</sup> )   | chasuble, lining textile                                | N/A                    | orange      | gallic acid, brazilein, <b>protosappanin B</b> , brazilin, <b>caes1</b> , <b>caesD</b> , hyperoside, <b>caesC</b> , <b>caes2</b> ,    | brazilwood           |                                                       |
| Church of the Visitation of the Blessed Virgin Mary (Monastery Church of the Carmelites) | N/A (KnP-15 <sup>#</sup> )  | stole, main textile                                     | N/A                    | red         | dcII, <b>carminic acid</b> , carminic acid derivative, dcIV, dcVII                                                                    | American cochineal   |                                                       |

| Church                                                                  | Textile number*             | Object*                      | Origin and dating*                  | Fiber color | Identified compounds                                                                                                                                                                                                         | Original dye                                                               | Remarks                                                            |
|-------------------------------------------------------------------------|-----------------------------|------------------------------|-------------------------------------|-------------|------------------------------------------------------------------------------------------------------------------------------------------------------------------------------------------------------------------------------|----------------------------------------------------------------------------|--------------------------------------------------------------------|
| Church of St Anne                                                       | N/A (KsA-4 <sup>#</sup> )   | burse, outer textile         | Europe, N/A                         | red         | dcII, <b><u>carminic acid</u></b> , dcOfka, carminic acid derivative, ellagic acid, dcIV, dcVII, flavokermesic acid, kermesic acid                                                                                           | American cochineal                                                         |                                                                    |
| Church of St Peter and St Paul                                          | N/A (KsPP-2 <sup>#</sup> )  | chasuble, textile from sides | Europe, the 17th cent. <sup>3</sup> | red         | <b><u>carminic acid</u></b> , dcIV, dcVII, kermesic acid                                                                                                                                                                     | cochineal of unknown origin                                                | presence of synthetic dye, original fiber color - red              |
| Church of St Peter and St Paul                                          | N/A (KsPP-5 <sup>#</sup> )  | chasuble, textile from sides | Europe, the 17th cent.              | red         | dcII, <b><u>carminic acid</u></b> , carminic acid derivative, ellagic acid, dcIV, dcVII, flavokermesic acid, kermesic acid                                                                                                   | American cochineal                                                         |                                                                    |
| Church of St Peter and St Paul                                          | N/A (KsPP-14 <sup>#</sup> ) | chalice velum, main textile  | Europe, the 17th cent.              | red         | dcII, <b><u>carminic acid</u></b> , luteolin 7-O-glc, carminic acid derivative, ellagic acid, dcIV, dcVII, <b>genistein</b> , luteolin methyl ether (1), flavokermesic acid, kermesic acid, biochanin A                      | American cochineal + traces of dyer's broom                                | traces of synthetic dye                                            |
| Church of the Conversion of St Paul (Monastery Church of the Lazarists) | N/A (M-7 <sup>#</sup> )     | chalice velum, main textile  | Near East, the 17th cent.           | violet      | <b><u>carminic acid</u></b> , <b><u>luteolin di-O-hex</u></b> , caesC, <b><u>luteolin 7-O-glc</u></b> , <b><u>luteolin O-glc (1)</u></b> , <b><u>luteolin O-glc (2)</u></b> , <b>sulfuretin</b> , <b>luteolin</b> , apigenin | brazilwood + weld + young fustic + traces of cochineal (of unknown origin) | presence of synthetic dye, original fiber color - yellow or orange |

**bold and underlined** – main compounds; **bold** – secondary compounds; non-highlighted – minor compounds; glc – glucoside, hex – hexoside, glcr – glucuronide, prmv – primeveroside; \* detailed data presented in “KATALOG TKANIN z zasobów kościelnych Krakowa z czasów od XV do końca XVII” (in Polish), Natalia Krupa (ed.), Kraków (in printing); textile origin and dating have been established by: <sup>1</sup> N. Krupa, <sup>2</sup> A. Warzecha, <sup>3</sup> K. Moskal, <sup>4</sup> B. Biedrońska-Słota; # initial object number
